# When and why does motor preparation arise in recurrent neural network models of motor control?

Marine Schimel<sup>1</sup>, Ta-Chu Kao<sup>2</sup>, and Guillaume Hennequin<sup>1</sup>

<sup>1</sup>Computational and Biological Learning Lab, Department of Engineering, University of Cambridge, Cambridge, U.K.  
<sup>2</sup>Meta Reality Labs

✉ Corresponding author (mmcs3@cam.ac.uk)

## Summary

During delayed ballistic reaches, motor areas consistently display movement-specific activity patterns prior to movement onset. It is unclear why these patterns arise: while they have been proposed to seed an initial neural state from which the movement unfolds, recent experiments have uncovered the presence and necessity of ongoing inputs during movement, which may lessen the need for careful initialization. Here, we modelled the motor cortex as an input-driven dynamical system, and we asked what the optimal way to control this system to perform fast delayed reaches is. We find that delay-period inputs consistently arise in an optimally controlled model of M1. By studying a variety of network architectures, we could dissect and predict the situations in which it is beneficial for a network to prepare. Finally, we show that optimal input-driven control of neural dynamics gives rise to multiple phases of preparation during reach sequences, providing a novel explanation for experimentally observed features of monkey M1 activity in double reaching.

1 During the production of ballistic movements, the motor cortex is thought to operate as a dynamical system whose state trajectories trace out the appropriate motor commands for downstream effectors (Shenoy et al., 2013; Miri et al., 2017; Russo et al., 2018). The extent to which these cortical dynamics are controlled by exogenous inputs before and/or during movement is the subject of ongoing study.

9 On the one hand, several experimental and modelling studies point to a potential role for exogenous inputs in motor preparation. First, cortical state trajectories are empirically well described by low-dimensional dynamics that evolve near-autonomously during movement (Churchland et al., 2012; Pandarinath et al., 2018; Schimel et al., 2022), such that there is a priori no reason to suspect that inputs are required for motor production. Rather, inputs would be required during preparation to bring the state of the cortical network into a suitable initial condition. This input-driven seeding process is corroborated by observations of movement-specific primary motor cortex (M1) activity arising well before movement initiation (Lara et al., 2018; Kaufman et al., 2014; Churchland et al., 2012; Meirhaeghe et al., 2023; Figure 1A), and associated models demonstrate the critical role of preparatory inputs therein (Sussillo et al., 2015; Hennequin et al., 2014; Kao et al., 2021).

27 On the other hand, recent studies have shown that the cortex receives critical input from the thalamus during movement production (Sauerbrei et al., 2020), and that sensory feedback may also contribute significantly to the observed dynamics of M1 (Kalidindi et al., 2021).

32 Moreover, most published network models of delayed reaches are able to perform the task just as well without preparatory inputs, i.e. with external inputs forcefully confined to the movement epoch – an illustrative example is shown in Figure 1B. Thus, the relative contributions of preparatory vs. movement-epoch inputs to motor cortex dynamics remain unclear.

39 In addition to the specific form that inputs to cortical dynamics might take, one may ask more broadly about the computational role of motor preparation. Motor preparation is known to benefit behaviour (e.g. by shortening reaction times and enabling more accurate execution Riehle and Requin, 1989; Churchland and Shenoy, 2007; Michaels et al., 2015) and may facilitate motor learning (Sheahan et al., 2016; Sun et al., 2022). However, from the perspective of cortical dynamics, preparation also introduces additional constraints. Specifically, the high density of M1 neurons projecting directly to the spinal cord (Dum and Strick, 1991) suggests that motor cortical outputs control lower-level effectors with little intermediate processing. For preparatory processes to avoid triggering premature movement, any pre-movement activity in the motor and dorsal premotor (PMd) cortices must carefully exclude those pyramidal tract neurons. While this can be achieved by constraining neural activity to evolve in a nullspace of the motor output (Kaufman et al., 2014), the question nevertheless arises: what advantage is there to having neural dynamics begin earlier in a constrained manner, rather than unfold freely just in time for movement production?

63 Here we sought a normative explanation for motor  
64 preparation at the level of motor cortex dynamics: we  
65 asked whether preparation arises in recurrent neural  
66 networks (RNNs) performing delayed reaching tasks,  
67 and what factors lead to more or less preparation. Such  
68 an explanation could not be obtained from previous net-  
69 work models of delayed reaches, as they typically as-  
70 sume from the get-go that the cortical network receives  
71 preparatory inputs during a fixed time window preced-  
72 ing the go cue (Sussillo et al., 2015; Kao et al., 2021).  
73 In this case, pre-movement activity is by design a crit-  
74 ical determinant of the subsequent behaviour (Sussillo  
75 et al., 2015; Kao et al., 2021; Zimnik and Churchland,  
76 2021). In this work, we removed this modelling assump-  
77 tion and studied models in which the correct behaviour  
78 could in principle be obtained without explicit motor  
79 preparation.

80 To study the role of motor preparation, and that of ex-  
81 ogenous inputs in this process, we followed an optimal  
82 control approach (Harris and Wolpert, 1998; Todorov  
83 and Jordan, 2002; Yeo et al., 2016). We considered the  
84 dynamics of a recurrent neural network (RNN) model  
85 of M1 coupled to a model arm (Todorov and Li, 2003),  
86 and used a standard control cost functional to quantify  
87 and optimize performance in a delayed-reaching task.  
88 We used the iLQR algorithm (Li and Todorov, 2004)  
89 to find the spatiotemporal patterns of network inputs  
90 that minimize this cost functional, for any given net-  
91 work connectivity. Critically, these inputs could arise  
92 both before and during movement; thus, our framework  
93 allowed for principled selection amongst a continuum of  
94 motor strategies, going from purely autonomous motor  
95 generation following preparation, to purely input-driven  
96 unprepared dynamics.

97 We considered an inhibition-stabilized network – which  
98 was shown previously to capture prominent aspects of  
99 monkey M1 activity (Hennequin et al., 2014; Kao et al.,  
100 2021) – and found that optimal control of the model re-  
101 quires preparation, with optimal inputs arising well be-  
102 fore movement begins. To understand what features of  
103 network connectivity lead to optimal preparatory con-  
104 trol strategies, we first turned to low-dimensional mod-  
105 els, which could be more easily dissected. We then  
106 generalized insights from those systems back to high-  
107 dimensional networks using tools from control theory,  
108 and found that preparation can be largely explained  
109 by two quantities summarizing the dynamical response  
110 properties of the network.

111 Finally, we studied the optimal control of movement *se-*  
112 *quences*. Consistent with recent experimental findings  
113 (Zimnik and Churchland, 2021), we observed that opti-  
114 mal control of compound reaches leads to input-driven  
115 preparatory activity in a dedicated activity subspace  
116 prior to each movement chunk.

117 Overall, our results show that preparatory neural ac-  
118 tivity patterns arise from optimal control of reaching  
119 movements at the level of motor cortical circuits, thus

120 providing a possible explanation for a number of ob-  
121 served experimental findings.

## 122 Model

### 123 A model of cortical dynamics for reaching 124 movements

125 We considered a simple reaching task, in which the hand  
126 must move from a resting location to one of eight radi-  
127 ally located targets in a 2D plane as fast as possible  
128 (Figure 1). The target had to be reached within 600 ms  
129 of a go cue that followed a delay period of varying (but  
130 known) duration. We modelled the trajectory of the  
131 hand via a two-jointed model arm (Li and Todorov,  
132 2004; Kao et al., 2021), driven into motion by a pair  
133 of torques  $\mathbf{m}(t)$  (Methods). We further assumed that  
134 these torques arose as a linear readout of the momentary  
135 firing rates  $\mathbf{r}(t)$  of a population of M1 neurons,

$$136 \mathbf{m}(t) = \mathbf{C}\mathbf{r}(t) \quad (1)$$

137 where  $\mathbf{C}$  was a randomly generated readout matrix. We  
138 modelled the dynamics of  $N = 200$  M1 neurons using a  
139 standard rate equation,

$$140 \tau \frac{d\mathbf{x}(t)}{dt} = -\mathbf{x}(t) + \mathbf{W}\mathbf{r}(t) + \mathbf{h} + \mathbf{u}(t) \quad (2)$$
$$141 \mathbf{r}(t) = \phi[\mathbf{x}(t)], \quad (3)$$

142 where the momentary population firing rate vector  $\mathbf{r}(t)$   
143 was obtained by passing a vector of internal neuronal  
144 activations  $\mathbf{x}(t)$  through a rectified linear function  $\phi[\cdot]$ ,  
145 element-wise. In Equation 2,  $\mathbf{h}$  is a constant input  
146 that establishes a baseline firing rate of 5 Hz on aver-  
147 age, with a standard deviation of 5 Hz across neurons,  
148  $\mathbf{u}(t)$  is a task-dependent control input (see below), and  
149  $\mathbf{W}$  denotes the matrix of recurrent connection weights.  
150 Throughout most of this work, we considered inhibition-  
151 stabilized M1 dynamics (Hennequin et al., 2014; Meth-  
152 ods), which have previously been shown to produce ac-  
153 tivity resembling that of M1 during reaching (Kao et al.,  
154 2021). Thus, our model can be viewed as a two-level  
155 controller, with the arm being controlled by M1, and  
156 M1 being controlled by external inputs. Note that each  
157 instantiation of our model corresponds to a set of  $\mathbf{W}$ ,  
158  $\mathbf{C}$ , and  $\mathbf{h}$ , none of which are specifically optimized for  
159 the task.

### 157 To prepare or not to prepare?

158 Previous experimental (Churchland et al., 2012; Shenoy  
159 et al., 2013) and modelling (Hennequin et al., 2014; Sus-  
160 sillo et al., 2015; Pandarinath et al., 2018) work sug-  
161 gests that fast ballistic movements rely on strong, near-  
162 autonomous internal dynamics in M1. Network-level  
163 models of ballistic control thus rely critically on a prepa-  
164 ration phase during which the motor cortex is driven

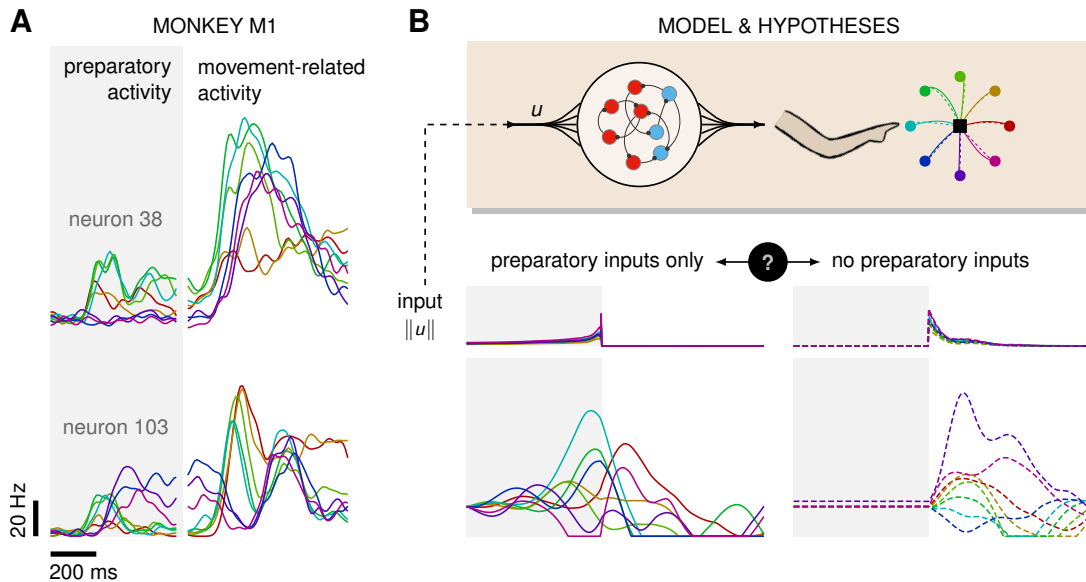

**Figure 1: Control is possible under different strategies.** (A) Trial-averaged firing rate of two representative monkey M1 neurons, across 8 different movements, separately aligned to target onset (left) and movement onset (right). Neural activity starts separating across movements well before the animal starts moving. (B) Top: a RNN model of M1 dynamics receives external inputs  $\mathbf{u}(t)$  from a higher-level controller, and outputs control signals for a biophysical two-jointed arm model. Inputs are optimized for the correct production of eight center-out reaches to targets regularly positioned around a circle. Bottom: firing rate of a representative neuron in the RNN model for each reach, under two extreme control strategies. In the first strategy (left, solid lines), the external inputs  $\mathbf{u}(t)$  are optimized whilst being temporally confined to the preparatory period. In the second strategy (right, dashed lines), they are optimized whilst confined to the movement period. Although slight differences in hand kinematics can be seen (compare corresponding solid and dashed hand trajectories), both control policies lead to successful reaches. These introductory simulations are shown for illustration purposes; the particular choice of network connectivity and the way the control inputs were found are described in the Results section.

165 into a movement-specific state that seeds its subsequent  
 166 autonomous dynamics (Kao et al., 2021; Sussillo et al.,  
 167 2015). However, somewhat paradoxically, the same re-  
 168 current neural network models can also solve the task in  
 169 a completely different regime, in which task-related in-  
 170 puts arise during movement only, with no preparatory  
 171 inputs whatsoever. We illustrate this dichotomy in Fig-  
 172 ure 1. The same center-out reach can be produced with  
 173 control inputs to M1 that arise either prior to move-  
 174 ment only (full lines), or during movement only (dashed  
 175 lines). In the latter case, no reach-specific preparatory  
 176 activity is observed, making the model inconsistent with  
 177 experimental findings. But what rationale is there in  
 178 preparing for upcoming movements, then?

179 To address this question, we formulated delayed reach-  
 180 ing as an optimal control problem, and asked what ex-  
 181 ternal inputs are required, and at what time, to drive  
 182 the hand into the desired position with minimum con-  
 183 trol effort. Specifically, we sought inputs that were as  
 184 weak as possible yet accurately drove the hand to the  
 185 target within an allotted time window. We also penal-  
 186 ized inputs that caused premature movement before the  
 187 go cue.

188 Thus, we solved for spatio-temporal input trajectories  
 189 that minimized a cost functional capturing the various  
 190 task requirements. Our cost was composed of three  
 191 terms:  $\mathcal{J}_{\text{target}}$  penalizes deviations away from the target,

192 with an “urgency” weight that increases quadratically  
 193 with time, thus capturing the implicit incentive for ani-  
 194 mals to perform fast reaches in such experiments (which  
 195 are normally conducted in sessions of fixed duration).  
 196  $\mathcal{J}_{\text{null}}$  penalizes premature movement during prepara-  
 197 tion, as measured by any deviation in position, speed  
 198 and acceleration of the hand. Finally,  $\mathcal{J}_{\text{effort}}$  penalizes  
 199 control effort in the form of input magnitude through-  
 200 out the whole trial, thus promoting energy-efficient con-  
 201 trol solutions amongst a typically infinite set of possi-  
 202 bilities (Kao et al., 2021; Sterling and Laughlin, 2015).  
 203 Note that  $\mathcal{J}_{\text{effort}}$  can be viewed as a standard regulariza-  
 204 tion term, and must be included to ensure the control  
 205 problem is well defined. The total objective thus had  
 206 the following form :

$$\begin{aligned}
 \mathcal{J}[\mathbf{u}(t)] = & \underbrace{\int_0^T \|\boldsymbol{\theta}(t) - \boldsymbol{\theta}^*\|^2 \frac{t^2}{T^2} \frac{dt}{T}}_{\mathcal{J}_{\text{target}}} \\
 & + \underbrace{\alpha_{\text{null}} \int_{-\Delta_{\text{prep}}}^0 \left( \|\boldsymbol{\theta}(t) - \boldsymbol{\theta}_0\|^2 + \|\dot{\boldsymbol{\theta}}(t)\|^2 + \|\mathbf{m}(t)\|^2 \right) \frac{dt}{T}}_{\mathcal{J}_{\text{null}}} \\
 & + \underbrace{\alpha_{\text{effort}} \int_{-\Delta_{\text{prep}}}^T \|\mathbf{u}(t)\|^2 \frac{dt}{NT}}_{\mathcal{J}_{\text{effort}}}, \quad (4)
 \end{aligned}$$

207 where  $\boldsymbol{\theta}$  and  $\dot{\boldsymbol{\theta}}$  denote the position and velocity of the

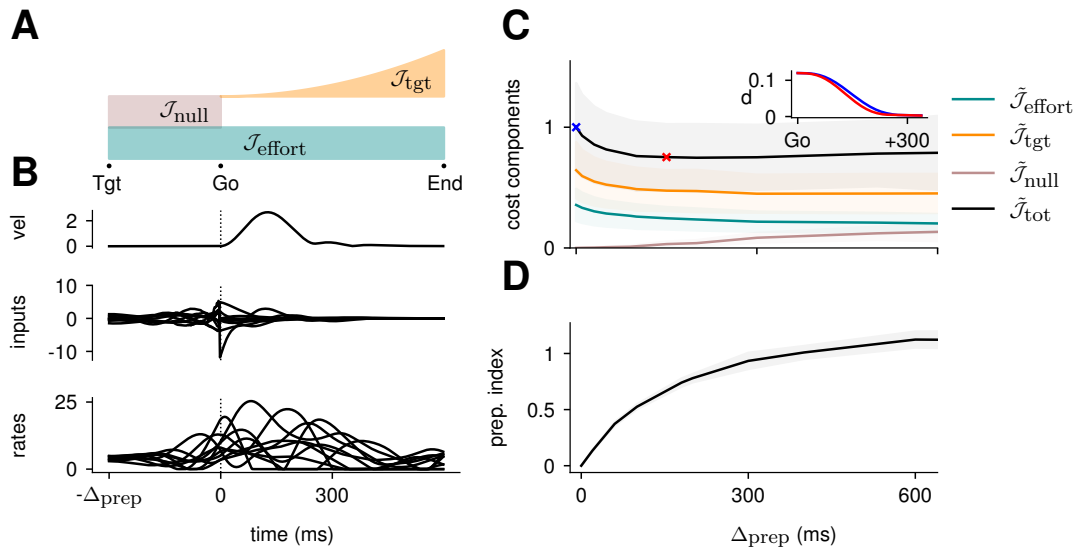

**Figure 2: Optimal control of the ISN network.** (A) Illustration of the different terms in the control cost function, designed to capture the different requirements of the task. “Tgt” marks the time of target onset, “Go” that of the go cue (known in advance) and “End” the end of the trial. (B) Time course of the hand velocity (top), optimal control inputs (middle; 10 example neurons), and firing rates (bottom, same neurons) during a delayed reach to one of the 8 targets shown in Figure 1A. Here, the delay period was set to  $\Delta_{prep} = 300$  ms. Note that inputs arise well before the go cue, even though they have no direct effect on behaviour at that stage. (C) Dependence of the different terms of the cost function on preparation time. All costs are normalized by the total cost at  $\Delta_{prep} = 0$  ms. The inset shows the time course of the hand’s average distance to the relevant target when no preparation is allowed (blue) and when preparation is allowed (red). Although the target is eventually reached for all values of  $\Delta_{prep}$ , the hand gets there faster with longer preparation times, causing a decrease in  $\mathcal{J}_{tgt}$  – and therefore also in  $\mathcal{J}_{tot}$ . Another part of the decrease in  $\mathcal{J}_{tot}$  is due to a progressively lower input energy cost  $\mathcal{J}_{effort}$ . On the other hand, the cost of staying still before the Go cue increases slightly with  $\Delta_{prep}$ . (D) We define the preparation index as the ratio of the norms of the external inputs during preparation and during movement (see text). The preparation index measures how much the optimal strategy relies on the preparatory period. As more preparation time is allowed, this is used by the optimal controller and more inputs are given during preparation. For longer preparation times, this ratio increases sub-linearly, and eventually settles.

208 hand in angular space,  $\Delta_{prep}$  was the duration of the 232  
 209 delay period and  $T$  that of the movement period. As 233  
 210  $\mathcal{J}_{target}$  and  $\mathcal{J}_{null}$  depend on  $\mathbf{u}(t)$  implicitly through 234  
 211 Equations 1 and 2,  $\mathcal{J}$  is a function of  $\mathbf{u}$  only. Im- 235  
 212 portantly, we allowed for inputs within a time window 236  
 213 beginning  $\Delta_{prep}$  ms before, and ending  $T$  ms after the 237  
 214 go cue (set at  $t = 0$ ). Therefore, both preparation-only  
 215 and movement-only input strategies (cf. Figure 1) could  
 216 potentially arise, as well as anything in between.

217 Here, we solved for the optimal control inputs using the  
 218 iterative linear quadratic regulator algorithm (iLQR; Li  
 219 and Todorov, 2004), an efficient trajectory optimization  
 220 algorithm that is well-suited for handling the nonlinear  
 221 nature of both the arm’s and the network’s dynamics.  
 222 As our primary goal was to assess the role of preparation  
 223 in a normative way, we did not study the putative  
 224 circuit dynamics upstream of M1 that might lead to the  
 225 computation of these optimal inputs.

226 We balanced the various components of our cost func-  
 227 tional by choosing  $\alpha_{null}$  and  $\alpha_{effort}$  to qualitatively  
 228 match the behavioural requirements of a typical reach-  
 229 and-hold task. Specifically, we tuned them jointly so as  
 230 to ensure (i) stillness during preparation, and (ii) reach  
 231 duration of approximately  $\sim 400$  ms, with the hand

staying within 0.5cm of the target for  $\sim 200$  ms after  
 the end of the reach. We ensured that the main quali-  
 tative features of the solution, i.e. the results presented  
 below, were robust to the choice of hyperparameter val-  
 ues within the fairly large range in which the above soft-  
 constraints are satisfied (Supplementary Material S1).

## 238 Results

### 239 Preparation arises as an optimal control 240 strategy

241 Using the above control framework, we assessed whether  
 242 the optimal way of performing a delayed reach involves  
 243 preparation. More concretely, does the optimal control  
 244 strategy of the model described in Equation 2 involve  
 245 any preparatory inputs during the delay period? For  
 246 any single optimally performed reach, we found that  
 247 network activity began changing well before the go cue  
 248 (Figure 2B, bottom), and that this was driven by in-  
 249 puts that arose early (Figure 2B, middle). Thus, al-  
 250 though preparatory network activity cancels in the read-  
 251 out (such that the hand remains still; Figure 2B, top)

and therefore does not contribute directly to movement, it still forms an integral part of the optimal reach strategy. To quantify how much the optimal control strategy relied on inputs prior to movement, we defined the *preparation index* as the ratio of input magnitude during the delay period to that during the remainder of the trial:

$$\text{prep. index} = \sqrt{\frac{\int_{-\Delta_{\text{prep}}}^0 \|\mathbf{u}(t)\|^2 dt}{\int_0^T \|\mathbf{u}(t)\|^2 dt}}. \quad (5)$$

We found that the preparation index rose sharply as we increased the delay period, and eventually plateaued at  $\sim 1.3$  for delay periods longer than 300 ms (Figure 2C). Similarly, the total cost of the task was highest in the absence of preparation, and decreased until it also reached a plateau at  $\Delta_{\text{prep}} \sim 300$  ms (Figure 2C, black). This appears somewhat counterintuitive, as having a larger  $\Delta_{\text{prep}}$  means that both  $\mathcal{J}_{\text{effort}}$  and  $\mathcal{J}_{\text{null}}$  are accumulated over a longer period. To resolve this paradox, we examined each component of the cost function. We found that the overall decrease in cost with increasing preparation time was driven by a concurrent decrease in both  $\mathcal{J}_{\text{tgt}}$  and  $\mathcal{J}_{\text{effort}}$ . The former effect was due to the model producing faster reaches (Figure 2C inset; hand position for a reach with (red) and without (blue) preparation) while the latter arose from the use of smaller control inputs when preparation was allowed. Together, these results suggest that the presence of a delay period changes the optimal control strategy for reaching, and increases performance in the task.

The results above show that delaying the reach beyond  $\sim 300$  ms brings little benefit; in particular, all components of the cost stabilize past that point (Figure 2C). We thus wondered what features the optimally controlled dynamics would display as  $\Delta_{\text{prep}}$  increased beyond 300 ms. Would the network defer preparation to a last minute surge, or prepare more gently over the entire preparatory window? Would the network produce the same neural activity patterns? We found that the optimal controller made very little use of any preparation time available up to 300 ms before the go cue: with longer preparation times, external input continued to arise just a couple of hundred milliseconds before movement initiation, and single neuron firing rates remained remarkably similar (Figure 3A). This was also seen in PCA projections of the firing rates, which traced out similar trajectories irrespective of the delay period (Figure 3B). We hypothesized that this behaviour is due to the network dynamics having a certain maximum characteristic timescale, such that inputs that arrive too early end up being “forgotten” – they increase  $\mathcal{J}_{\text{effort}}$  and possibly  $\mathcal{J}_{\text{null}}$  without having a chance to influence  $\mathcal{J}_{\text{tgt}}$ . We confirmed this by varying the characteristic time constant ( $\tau$  in Equation 2). For a fixed  $\Delta_{\text{prep}}$ , we found that for larger (resp. lower) values of  $\tau$ , the optimal control inputs started rising earlier (resp. later) and thus occupied more (resp. less) of the allotted preparatory period (Supplementary Material S3).

## Understanding optimal control in simplified models

Having established that the ISN model of M1 relies on preparatory inputs to solve the delayed reaching task, we next tried to understand *why* it does so. To further unravel the interplay between the structure of the network and the optimal control strategy, i.e. what aspects of the dynamics of the network warrant preparation, we turned to simpler, two-dimensional models of cortical dynamics. These 2D models are small enough to enable detailed analysis (Supplementary Material S3), yet rich enough to capture the two dominant dynamical phenomena that arise in ISN dynamics: nonnormal amplification (Murphy and Miller, 2009; Goldman, 2009; Hennequin et al., 2012) and oscillations (Brunel, 2000; Dayan and Abbott, 2001). Specifically, networks of E and I neurons have been shown to embed two main motifs of effective connectivity which are revealed by appropriate orthogonal changes of basis: (i) feedforward (“nonnormal”) connectivity whereby a “source mode” of E-I imbalance feeds into a “sink mode” in which balance is restored, and (ii) anti-symmetric connectivity that causes the two populations to oscillate.

To study the impact of each of these prototypical connectivity motifs on movement preparation, we implemented them separately, i.e. as two small networks of two units each, with an overall connectivity scale parameter  $w$  which we varied (Figure 4A and D; Methods). As both nonnormal and oscillatory dynamics arise from linear algebraic properties of the connectivity matrix, we considered linear network dynamics for this analysis ( $\phi(x) = x$  in Equation 3). Moreover, to preserve the existence of an output nullspace in which preparation could in principle occur without causing premature movement, we reduced the dimensionality of the motor readout from 2D (where there would be no room left for a nullspace) to 1D (leaving a 1D nullspace), and adapted the motor task so that the network now had to move the hand position along a single dimension (Figure 4B and E, top). Analogous to the previous arm model, we assumed that the hand’s acceleration along this axis was directly given by the 1D network readout.

We found that optimal control of both dynamical motifs generally led to preparatory dynamics, with inputs arising before the go cue (Figure 4B and E, bottom). In the feedforward motif, the amount of preparatory inputs appeared to depend critically on the orientation of the readout. When the readout was aligned with the sink (brown) mode (Figure 4B, left), the controller prepared the network by moving its activity along the source (orange) mode (Figure 4C, left). This placed the network in a position from which it had a natural propensity to generate large activity transients along the readout dimension (c.f. flow field in Figure 4A); here, these transients were exploited to drive the fast upstroke in hand acceleration and throw the hand towards the target location. Note that this strategy reduces the amount of

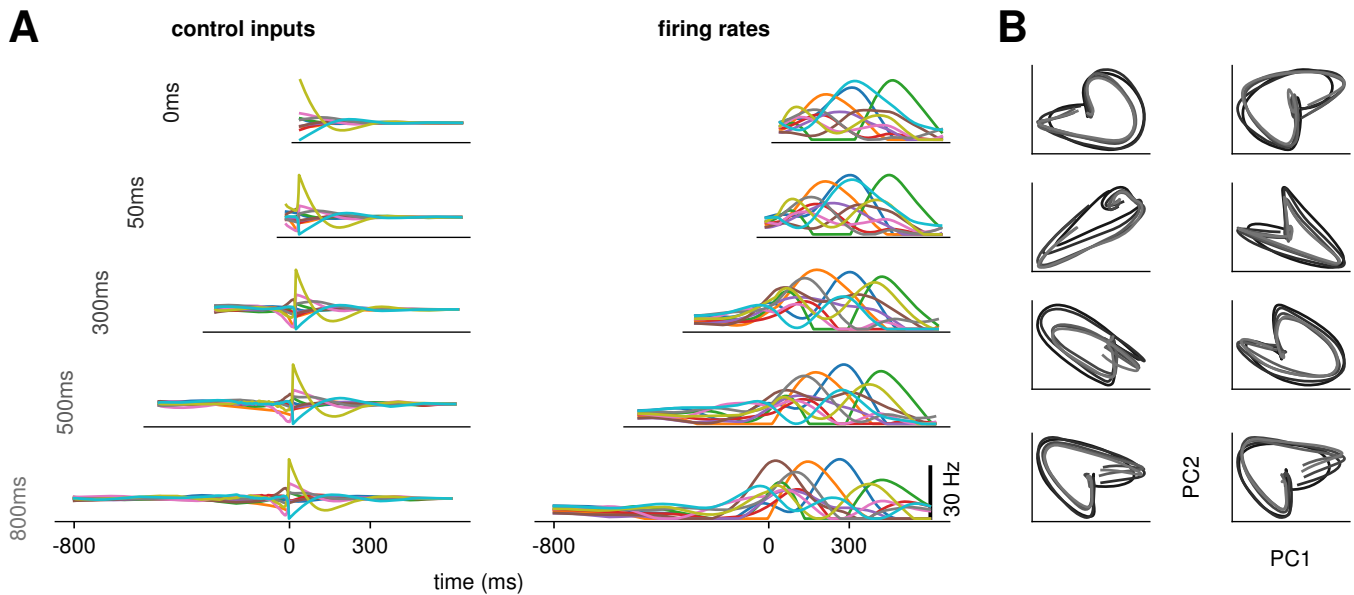

**Figure 3: Conservation of the optimal control strategy across delays** (A) Optimal control inputs to ten randomly chosen neurons in the model RNN (left) and their corresponding firing rates (right) for different preparation times  $\Delta_{\text{prep}}$  (ranging from 0 to 800 ms; c.f. labels). (B) Projection of the movement-epoch population activity for each of the 8 reaches (panels) and each value of  $\Delta_{\text{prep}}$  shown in A (darker to lighter colors). These population trajectories are broadly conserved across delay times, and become more similar for larger delays.

364 input the controller needs to deliver during the move-  
 365 ment, because the network itself does most of the work.  
 366 Nevertheless, in this case the network’s own impulse re-  
 367 sponse was not rich enough to accommodate the phase  
 368 reversal required to subsequently slow the hand down  
 369 and terminate the movement. Optimal control there-  
 370 fore also involved inputs during the movement epoch,  
 371 leading to a preparatory index of  $\sim 0.54$  (Figure 4G,  
 372 dark blue).

373 When it was instead the source mode that was read  
 374 out (Figure 4B, right), the only dimension along which  
 375 the system could prepare without moving was the sink  
 376 mode. Preparing this way is of no benefit, because the  
 377 flow field along the sink mode has no component along  
 378 the source (readout) mode. Thus, here the optimal  
 379 strategy was to defer control to the movement epoch,  
 380 during which the transient growth of network activity  
 381 along the readout rested entirely on adequate control in-  
 382 puts. This led to a preparation index of  $\sim 0$  (Figure 4G,  
 383 pale green). Although the network did react with large  
 384 activity excursions along the sink mode (Figure 4C,  
 385 right), these were inconsequential for the movement.  
 386 Importantly, of the two extreme readout configurations  
 387 discussed above, the first one yielded a smaller overall  
 388 optimal control cost (by a factor of  $\sim 1.5$ ). Thus, at  
 389 a meta-control level, ideal downstream effectors would  
 390 read out the sink mode, not the source mode. Note that  
 391 while increasing the connectivity strength initially led to  
 392 more preparation (Figure 4H), a plateau was eventually  
 393 reached for  $w \geq 4$ . Indeed, while stronger dynamics ini-  
 394 tially make preparation more beneficial, they also make  
 395 it more difficult for preparatory activity to remain in

396 the readout nullspace.

397 We obtained similar insights for oscillatory network dy-  
 398 namics (Figure 4D-F). A key difference however was  
 399 that the flow field was rotationally symmetric such  
 400 that no distinction could be made between “source”  
 401 and “sink” units – indeed the optimal control strat-  
 402 egy yielded the same results (up to a rotation of the  
 403 state space) irrespective of which of the two units was  
 404 driving the hand’s acceleration (compare left and right  
 405 panels in Figure 4D-F). Nevertheless, the optimal con-  
 406 troller consistently moved the network’s activity along  
 407 the output-null axis during preparation, in such a way  
 408 as to engage the network’s own rotational flow immedi-  
 409 ately after the go cue (Figure 4F). This rotational flow  
 410 drove a fast rise and decay of activity in the readout  
 411 unit, thus providing the initial segment of the required  
 412 hand acceleration. The hand was subsequently slowed  
 413 down by modest movement-epoch control inputs which  
 414 eventually receded, leading to a preparation index of  
 415  $\sim 0.58$ . Interestingly, the preparation index showed a  
 416 decrease for very large  $w$  (Figure 4G), which did not re-  
 417 flect smaller preparatory inputs (Figure 4H) but rather  
 418 reflected the larger inputs that were required during  
 419 movement to cancel the fast oscillations naturally gen-  
 420 erated by the network.

421 The above results highlight how the optimal control  
 422 strategy is shaped by the dynamical motifs present in  
 423 the network. Crucially, we found that the optimal  
 424 way to control the movement depends not only on the  
 425 strength and flow of the internal network dynamics, but  
 426 also on their interactions with the readout.

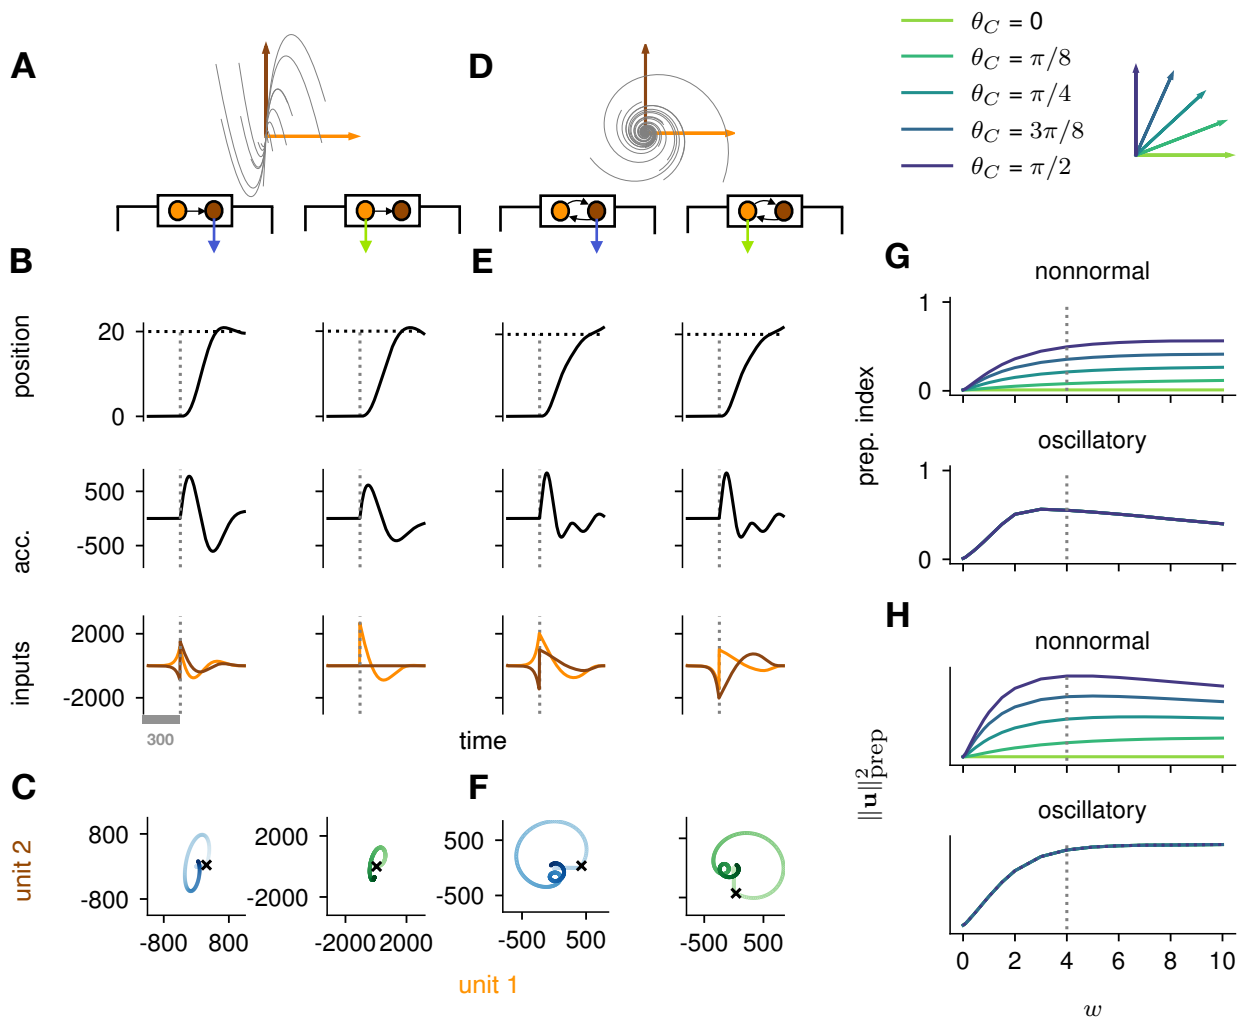

Figure 4: **Analysis of the interplay between the optimal control strategy and two canonical motifs of E-I network dynamics:** nonnormal transients driven by feedforward connectivity (A–C), and oscillations driven by anti-symmetric connectivity (D–F). (A) Activity flow field (10 example trajectories) of the nonnormal network, in which a “source” unit (orange) drives a “sink” unit (brown). We consider two opposite readout configurations, where it is either the sink (left) or the source (right) that drives the acceleration of the hand. (B) Temporal evolution of the hand position (top; the dashed horizontal line indicates the reach target), hand acceleration (middle) and optimal control inputs to the two units (bottom; colours matching panel A), under optimal control given each of the two readout configurations shown in A (left vs. right). The dashed vertical line marks the go cue, which follows a 300 ms delay period. While the task can be solved successfully in both cases, preparatory inputs are only useful when the sink is read out. (C) Network activity trajectories under optimal control. Each trajectory begins at the origin, and the end of the delay period is shown with a black cross. (D–F) Same as (A–C), for the oscillatory network. (G–H) Preparation index (top) and total amount of preparatory inputs (bottom) as a function of the scale parameter  $w$  of the network connectivity, for various readout configurations (colour-coded as shown in the top inset). The nonnormal network (top) prepares more when the readout is aligned to the most controllable mode, while the amount of preparation in the oscillatory network (bottom) is independent of the readout direction. The optimal strategy must balance the benefits from preparatory inputs which allow to exploit the intrinsic network dynamics, with the constraint to remain still. This is more difficult when the network dynamics are strong and pushing activity out of the readout-null subspace, explaining the decrease in preparation index for large values of  $w$  in the oscillatory network.

## Control-theoretic properties predict the amount of preparation

Our investigation of preparation in a low-dimensional system allowed us to isolate the impact of core dynamical motifs, and highlighted how preparation depends on the geometry of the flow field, and its alignment to the readout. However, these intuitions remain somewhat

qualitative, making them difficult to generalize to our high-dimensional ISN model.

To quantify the key criteria that appear important for preparation, we turned to tools from control theory. We reasoned that, for a network to be able to benefit from preparation and thus exhibit a large preparation index, there must be some advantage to using early inputs that do not immediately cause movement, relative

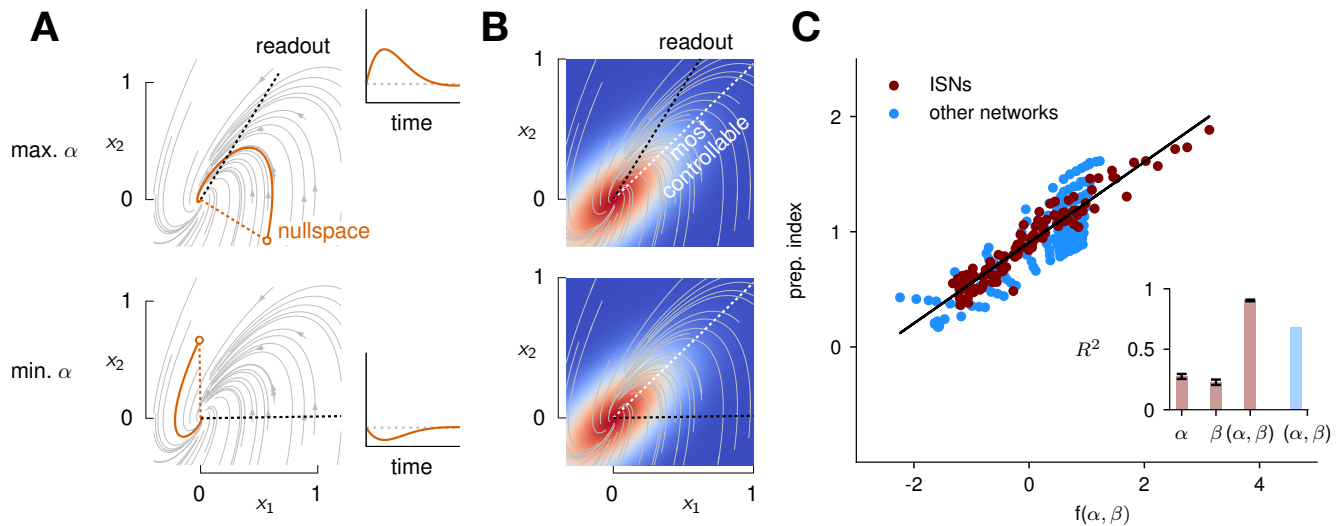

**Figure 5: Predicting the preparation index from the observability of the output nullspace ( $\alpha$ ) and the controllability of the readout ( $\beta$ , see details in text).** (A) Illustration of the observability of the output nullspace in a synthetic 2-dimensional system. The observability of a direction is characterized by how much activity (integrated squared norm) is generated along the readout by a unit-norm initial condition aligned with that direction. The top and bottom panels show the choices of readout directions (dotted black) for which the corresponding nullspace (dotted orange) is most (maximum  $\alpha$ ) and least (minimum  $\alpha$ ) observable, respectively. Trajectories initialized along the null direction are shown in solid orange, and their projections onto the readout are shown in the inset. (B) Illustration of the controllability of the readout in the same 2D system as in (A). To compute controllability, the distribution of activity patterns collected along randomly initialized trajectories is estimated (heatmap); the controllability of a given direction then corresponds to how much variance it captures in this distribution. Here, the network has a natural propensity to generate activity patterns aligned with the dashed white line ('most controllable' direction). The readout directions are repeated from panel A (dotted black). The largest (resp. smallest) value of  $\beta$  would by definition be obtained when the readout is most (resp. least) controllable. Note the tradeoff in this example: the choice of readout that maximizes  $\alpha$  (top) does not lead to the smallest  $\beta$ . (C) The values of  $\alpha$  and  $\beta$  accurately predict the preparation index ( $R^2 = 0.93$ ) for a range of high-dimensional ISNs (maroon dots) with different connectivity strengths and characteristic timescales (Methods). The best fit (after z-scoring) is given by  $f(\alpha, \beta) = (16.94 \pm 0.02)\alpha - (15.97 \pm 0.02)\beta$  (mean  $\pm$  sem were evaluated by bootstrapping). This confirms our hypothesis that optimal control relies more on preparation when  $\alpha$  is large and  $\beta$  is small. Note that  $\alpha$  and  $\beta$  alone only account for 34.8% and 30.4% of the variance in the preparation index, respectively (inset). Thus,  $\alpha$  and  $\beta$  provide largely complementary information about the networks' ability to use inputs, and can be combined into a very good predictor of the preparation index. Importantly, even though this fit was obtained *using ISNs only*, it still captures 69% of preparation index variance across networks from other families (blue dots; Methods).

442 to using later inputs that do. We hypothesized that  
 443 this advantage could be broken down into two criteria.  
 444 First, there must exist activity patterns that are  
 445 momentarily output-null (i.e. do not immediately cause  
 446 movement) yet seed output-potent dynamics that sub-  
 447 sequently move the arm. The necessity of this criterion  
 448 was obvious in the 2D nonnormal network, which  
 449 did not display any preparation when its nullspace was  
 450 aligned with its "sink" mode. In the language of control  
 451 theory, this criterion implies that the nullspace of  
 452 the readout must be sufficiently "observable" – we captured  
 453 this in a scalar quantity  $\alpha$  (Methods; Kao and  
 454 Hennequin, 2019; Skogestad and Postlethwaite, 2007).  
 455 Second, there must be a sizeable cost to performing the  
 456 movement in an entirely input-driven manner without  
 457 relying on preparation. In other words, the network  
 458 should be hard to steer along the readout direction, i.e.  
 459 the readout must be of limited "controllability" – we  
 460 captured this in another scalar quantity  $\beta$  (Methods).

461 We illustrate the meaning of these two metrics in Fig-

462 ure 5A and B for a 2-dimensional example network that  
 463 combines nonnormality and oscillations. We show two  
 464 extreme choices of readout direction (Figure 5A, dashed  
 465 black): the one that maximizes  $\alpha$  (top) and the one that  
 466 minimizes it (bottom). In the first case, the readout  
 467 nullspace (dashed orange) is very observable, i.e. trajec-  
 468 tories that begin in the nullspace evolve to produce large  
 469 transients along the readout (solid orange & inset). In  
 470 the second case, the opposite is true. For each case, we  
 471 also assessed the controllability of the readout ( $\beta$ ). The  
 472 controllability of a direction corresponds to how much  
 473 variance activity trajectories exhibit along that direc-  
 474 tion, when they are randomly and isotropically initial-  
 475 ized (Figure 5B). In other words, a very controllable  
 476 direction is one along which network trajectories have a  
 477 natural tendency to evolve.

478 We then assessed how well  $\alpha$  and  $\beta$  could predict the  
 479 preparation index of individual networks. In 2D net-  
 480 works, we found that a simple function that grows  
 481 with  $\alpha$  and decreases with  $\beta$  could accurately predict



482 preparation across thousands of networks (Supplement- 538  
483 ary Material S3.2). To assess whether these insights 539  
484 carried over to high-dimensional networks, we gener- 540  
485 ated a range of large ISNs with parameterically var- 541  
486 ied connectivity strengths and decay timescales (**Meth-** 542  
487 **ods**). We then regressed the preparation index against 543  
488 the values of  $\alpha$  and  $\beta$  computed for each of these net-  
489 works (as controllability and observability are only de-  
490 fined for linear networks, we set  $\phi(x) = x$  for this in-  
491 vestigation). We found that a simple linear mapping,  
492 prep. index =  $k_0 + k_\alpha\alpha + k_\beta\beta$ , with parameters fitted  
493 to one half of the ISN networks, accurately predicted  
494 the preparation indices of the other half (**Figure 5C**;  
495  $R^2 = 0.93$ , 5-fold cross-validated). Interestingly, we ob-  
496 served that although  $\alpha$  and  $\beta$  (which are both func-  
497 tions of the network connectivity) were highly corre-  
498 lated across different networks, discarding either vari-  
499 able in our linear regression led to a significant drop in  
500  $R^2$  (**Figure 5C**, inset). Importantly, it was their differ-  
501 ence that best predicted the preparation index ( $k_\alpha > 0$   
502 and  $k_\beta < 0$ ), consistent with our hypothesis that the  
503 preparation index is a relative quantity which increases  
504 as the nullspace becomes more observable, but decreases  
505 as readout dimensions become more controllable.

506 We were able to confirm the generality of this predictive  
507 model by generating networks with other types of con-  
508 nectivity (oscillatory networks, and networks with un-  
509 structured random weights), which displayed dynamics  
510 very different from the ISNs (see Supplementary Mate-  
511 rial S4). Interestingly, despite the different distribution  
512 of  $\alpha$  and  $\beta$  parameters in those networks, we could still  
513 capture a large fraction of the variance in their prepa-  
514 ration index ( $R^2 = 0.69$ ) using the linear fit obtained  
515 from the ISNs alone. This confirms that  $\alpha$  and  $\beta$  can  
516 capture information about the networks' dynamics in a  
517 universal manner.

518 Note that we do not make any claims about the specific  
519 functional form of the relationship between  $\alpha$ ,  $\beta$  and the  
520 preparation index. Rather, we claim that there should  
521 be a broad trend for the preparation index to increase  
522 with  $\alpha$  and decrease with  $\beta$ , and we acknowledge that  
523 this relationship could in general be nonlinear. Indeed,  
524 in 2D networks, we found that the preparation index  
525 was in fact better predicted by the ratio of  $\alpha$  over  $\beta$   
526 than by their difference (Supplementary Material S3.2).

## 527 Modelling movement sequences

528 Having gained a better understanding of what features  
529 lead a network to prepare, we next set out to assess  
530 whether optimal control could also explain the neu-  
531 ral preparatory processes underlying the generation of  
532 movement *sequences*. We revisited the experimental  
533 studies of **Zimmik and Churchland (2021)**, where mon-  
534 keys were trained to perform two consecutive reaches.  
535 Each trial started with the display of both targets, fol-  
536 lowed by an explicitly enforced delay period before the  
537 onset of the first reach. A distinction was made between

538 “double” reaches in which a pause was enforced between  
539 reaches, and “compound” reaches in which no pause  
540 was required. This study concluded that, rather than  
541 the whole movement sequence unrolling from a single  
542 preparatory period, each reach was instead successively  
543 seeded by its own preparatory activity.

544 Here, we asked whether such an independent, successive  
545 preparation strategy would arise as an optimal control  
546 solution, in the same way that single-reach preparation  
547 did. Importantly, we could not answer this question  
548 by directly examining network inputs as we did for sin-  
549 gle reaches. Indeed, any network input observed be-  
550 fore the second reach could be contributing either to  
551 the end of the first movement, or to the preparation of  
552 the next. In fact, the issue of teasing apart preparatory  
553 vs. movement-related activity patterns also arose in the  
554 analysis of the monkey data. To address this, **Zimmik**  
555 **and Churchland (2021)** exploited the fact that mon-  
556 key M1 activity just before and during single reaches  
557 is segregated into two distinct subspaces. Thus, mo-  
558 mentary activity patterns (during either single or dou-  
559 ble reaches) can be unambiguously labelled as prepara-  
560 tory or movement-related depending on which of the  
561 two subspaces they occupied. We performed a similar  
562 analysis (**Methods**) and verified that preparatory and  
563 movement activity patterns in the model were also well  
564 segregated in their respective subspaces in the single-  
565 reach task (**Figure 6A-B**). We then assessed the occu-  
566 pancy of the preparatory subspace during double reach-  
567 ing in the model, and took this measure as a signature  
568 of preparation.

569 To model optimal control of a double reach, we modi-  
570 fied our cost functional to account for the presence of  
571 two consecutive targets (see **Methods**). We considered  
572 the same set of eight targets as in our single-reach task,  
573 and modelled all possible combinations of two targets  
574 (one example shown in **Figure 6**). We set the hyper-  
575 parameters of the cost function such that both targets  
576 could be reached by the resulting optimal controller, in  
577 a way that matched important qualitative aspects of  
578 the monkeys' behaviour (in particular, such that both  
579 reaches were performed at similar velocities, with the  
580 second reach lasting slightly longer on average; **Fig-**  
581 **ure 6B-C**; top).

582 We projected the network activity onto preparatory and  
583 movement subspaces identified using single and double  
584 reaches activity (**Methods**). For double reaches with a  
585 long (600ms) pause, the preparatory subspace was tran-  
586 siently occupied twice, with the two peaks occurring just  
587 before the onset of each movement in the sequence (**Fig-**  
588 **ure 6B**; bottom).

589 Notably, the occupancy during the “compound” reach  
590 (without pause; **Figure 6C**) also started rising prior to  
591 the first movement before decaying very slightly and  
592 peaking again before the second reach, indicating two  
593 independent preparatory events. This is somewhat sur-  
594 prising, given that a movement sequence can also be

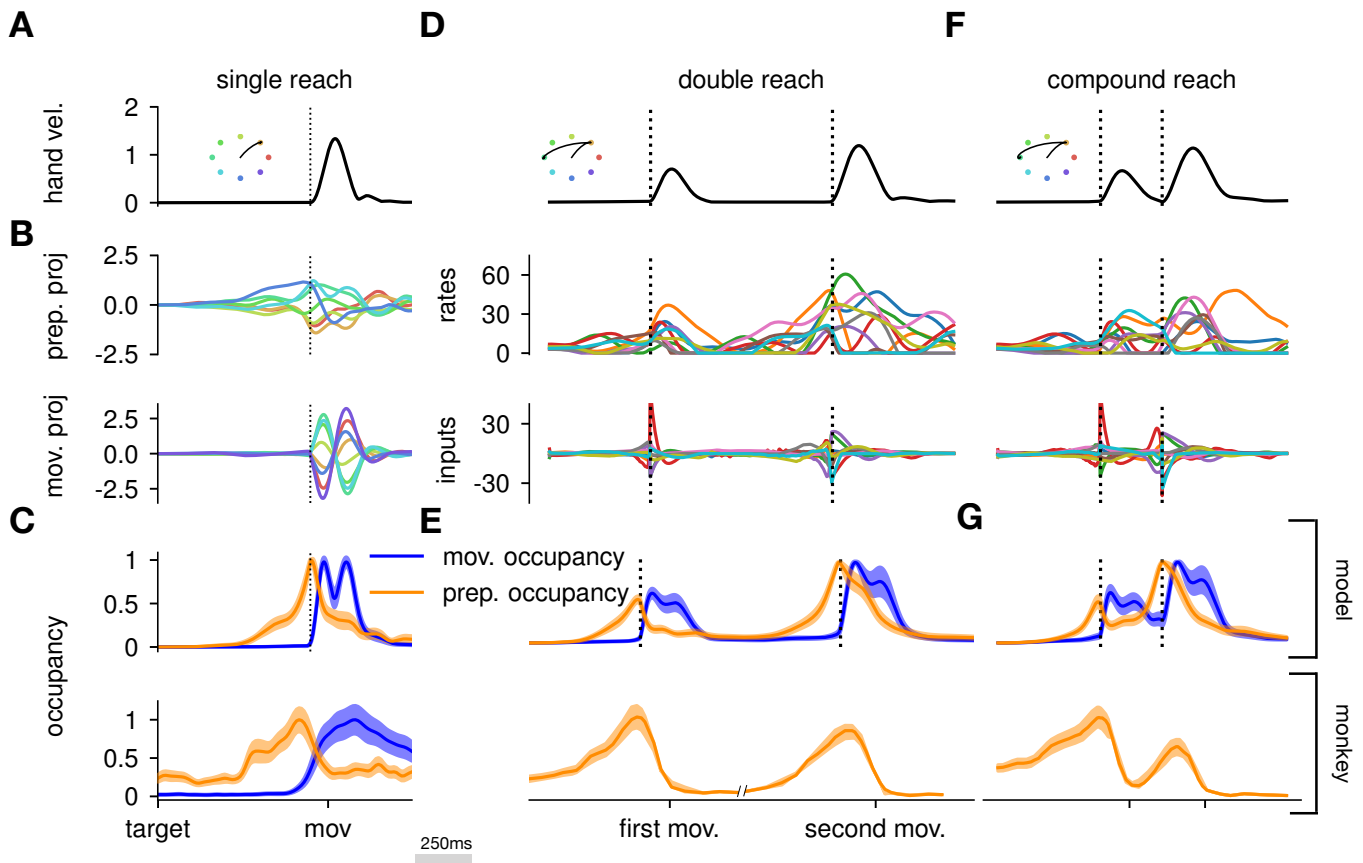

**Figure 6: The model executes a sequence of two reaches using an independent preparation strategy.** (A) Hand velocity during one of the reaches, with the corresponding hand trajectory shown in the inset. (B-C) We identified two 6-dimensional orthogonal subspaces, capturing 79% and 85% of total activity variance during single-reach preparation and movement respectively. (B) First principal component of the model activity for the 8 different reaches projected into the subspaces identified using preparatory (top) and movement-epoch (bottom) activity. (C) Occupancy (total variance captured across movements) of the orthogonalized preparatory and movement subspaces, in the model (top) and in monkey motor cortical activity (bottom; reproduced from Lara et al., 2018 for monkey Ax). We report mean  $\pm$  s.e.m., where the error is computed by bootstrapping from the neural population as in Lara et al. (2018). We normalize each curve separately to have a maximum mean value of 1. To align the model and monkey temporally, we re-defined the model’s ‘movement onset’ time to be 120 ms after the model’s hand velocity crossed a threshold – this accounts for cortico-spinal delays and muscle inertia in the monkey. Consistent with Lara et al. (2018)’s monkey M1 recordings, preparatory subspace occupancy in the model peaks shortly before movement onset, rapidly dropping thereafter to give way to pronounced occupancy of the movement subspace. Conversely, there is little movement subspace occupancy during preparation. (D) Behavioural (top) and neural (middle) correlates of the delayed reach for one example of a double reach with an enforced pause of 0.6 s. The optimal strategy relies on preparatory inputs preceding each movement. (E) Same as (C), for double reaches. The onsets of the monkey’s two reaches are separately aligned to the model’s using the same convention as in (C). The preparatory subspace displays two clear peaks of occupancy. This double occupancy peak is also observed in monkey neural activity (bottom; reproduced from Zimnik and Churchland, 2021, with the first occupancy peak aligned to that of the model). (F) Same as (D), for compound reaches with no enforced pause in between. Even though the sequence could be viewed as a single long movement, the control strategy relies on two periods of preparation. Here, inputs before the second reach are used to reinject energy into the system after slowing down at the end of the first reach. (G) Even though no explicit delay period is enforced in-between reaches during the compound movement, the preparatory occupancy rises twice, before the first reach and once again before the second reach. This is similar to observations in neural data (bottom; reproduced from Zimnik and Churchland, 2021).

595 viewed as a single “compound” movement, for which  
 596 we have shown previously a unique preparatory phase  
 597 is sufficient (Figure 2). In our model, this behaviour  
 598 can be understood to arise from the requirement that  
 599 the hand stop briefly at the first target. To produce the  
 600 second reach, the hand needs to accelerate again, which

601 requires transient re-growth of activity in the network.  
 602 Given that the network’s dynamical repertoire exhibits  
 603 limited timescales, this is most easily achieved by rein-  
 604 jecting inputs into the system.

605 In summary, our results suggest that the “independ-  
 606 ent” preparation strategy observed in monkeys is con-

sistent with the optimal control of a two-reach sequence. While [Zimnik and Churchland \(2021\)](#) showed that RNNs trained on this task used this “independent” strategy, this was by design as the network was only cued for the second reach after the first one had started. In addition to replicating this proof of concept that it is possible to prepare whilst moving, our model also shows how and why independent preparation might arise as an optimal control solution.

## Discussion

In this work, we proposed a model for the dynamics of motor cortex during a delayed reaching task in non-human primates. Unlike previous work, we treated M1 as an input-driven nonlinear dynamical system, with generic connectivity not specifically optimized for the task, but with external inputs assumed to be optimal for each reach. Motivated by a large body of evidence suggesting that preparation is useful before delayed reaches ([Churchland et al., 2010](#); [Lara et al., 2018](#); [Afshar et al., 2011](#); [Shenoy et al., 2013](#)), but also evidence for thalamic inputs being necessary for accurate movement execution ([Sauerbrei et al., 2020](#)), we used this model to investigate whether and why neural circuits might rely on motor preparation during delayed reaching tasks. Interestingly, preparation arose as an optimal control strategy in our model, with the optimal solution to the task relying strongly on inputs prior to movement onset. Moreover, the benefits of preparation were dependent on the network connectivity, with preparation being more prevalent in networks whose rich internal dynamics can be advantageously seeded by early external inputs. We were able to quantify this intuition with a predictive model relating the dynamical response properties of a network to the amount of preparation it exhibits when controlled optimally. Finally, we found that prominent features of the monkeys’ neural activity during sequential reaches arose naturally from optimal control assumptions. Specifically, optimally controlled networks relied on two phases of preparation when executing sequences of two reaches, corroborating recent experimental observations in monkey M1 ([Zimnik and Churchland, 2021](#)). Together, our results provide a normative explanation for the emergence of preparatory activity in both single and sequential reaching movements.

In recent years, task-optimized recurrent neural networks have become a very popular tool to model neural circuit dynamics. Classically, those models incorporate only those inputs that directly reflect task-related stimuli (e.g. motor target, go cue, etc). This requires assumptions about the form of the inputs, such as modelling them as simple step functions active during specific task epochs. However, as local neural circuits are part of a wider network of brain areas, a large portion of their inputs come from other brain areas at intermediate stages of the computation and may therefore not be

directly tied to task stimuli. Thus, it is not always obvious what assumptions can reasonably be made about the inputs that drive the circuit’s dynamics. Our optimization framework, which does not require us to make any specific assumptions about when and how inputs enter the network (although it does allow to incorporate prior information in the form of constraints), allows to bypass this problem and to implicitly model unobserved inputs from other areas. Importantly, our framework allows to ask questions – such as “why prepare” – that are difficult to phrase in standard input-driven RNN models. We note, however, that in the investigation we have presented here, the lack of imposed structure for the inputs also implied that the model could not make use of mechanisms known to contribute certain aspects of preparatory neural activity. For example, our model did not exhibit the usual visually-driven response to the target input, nor did it have to use the delay epoch to keep such a transient sensory input in memory ([Guo et al., 2014](#); [Li et al., 2015](#)). Moreover, while we did not introduce any strong assumptions about the temporal structure of inputs, we did assume for simplicity that the optimal controller was aware of the duration of the delay period. While this made solving for the optimal control inputs easier, it made our task more akin to a self-initiated reach ([Lara et al., 2018](#)) than to a typical delayed reach with unpredictable, stochastic delay durations. We note that our current framework could be generalized to the stochastic setting by using model predictive control to optimize the control inputs ([Rawlings et al., 2017](#)). Although this would be considerably more expensive computationally, we hypothesize that explicitly modelling such uncertainty over the delay period would not only yield a better model of the typical delayed reaching task, but may also lead to preparatory activity patterns arising immediately after target onset and persisting until the go cue.

Dynamical systems have a longstanding history as models of neural populations ([Dayan and Abbott, 2001](#)). However, understanding how neural circuits can perform various computations remains a challenging question. Recently, there has been increased interest in trying to understand the role of inputs in shaping cortical dynamics. This question has been approached both from a data-driven perspective ([Malonis et al., 2021](#); [Soldado-Magraner et al., 2023](#)), and in modelling work with e.g [Driscoll et al. \(2022\)](#) showing how a single network can perform different tasks by reorganizing its dynamics under the effect of external inputs and [Dubreuil et al. \(2021\)](#) relating network structure to the ability to process contextual inputs. To better understand how our motor system can generate flexible behaviours ([Loggiaco et al., 2021](#); [Stroud et al., 2018](#)), and to characterize learning on short timescales ([Sohn et al., 2020](#); [Heald et al., 2023](#)), it is important to study how network dynamics can be modulated by external signals that allow rapid adaptation to new contexts without requiring extensive modifications of the network’s connectivity. The optimal control approach we proposed here offers a way

721 to systematically perform such evaluations, in a vari- 728  
 722 ety of tasks and under different assumptions regarding 729  
 723 how inputs are allowed to impact the dynamics of the 730  
 724 local circuit of interest. While our model’s predictions 731  
 725 will depend on e.g. the choice of connectivity or the de- 732  
 726 sign of the cost function, an exciting direction for future 733  
 727 work will be to obtain those parameters in a data-driven

manner, for instance using recently developed methods  
 to infer dynamics from data (Pandarinath et al., 2018;  
 Schimel et al., 2022), and advances in inverse reinforce-  
 ment learning and differentiable control (Amos et al.,  
 2018) to infer the cost function that behaviour opti-  
 mizes.

## Methods

### Experimental model and subject details

In Figure 1, we showed data from two primate datasets that were made available to us by Mark Churchland, Matthew Kaufman and Krishna Shenoy. Details of animal care, surgery, electrophysiological recordings, and behavioral task have been reported previously in Churchland et al. (2012); Kaufman et al. (2014) (see in particular the details associated with the J and N “array” datasets). The subjects of this study, J and N, were two adult male macaque monkeys (*Macaca mulatta*). The animal protocols were approved by the Stanford University Institutional Animal Care and Use Committee. Both monkeys were trained to perform a delayed reaching task on a fronto-parallel screen. At the beginning of each trial, they fixated on the center of the screen for some time, after which a target appeared on the screen. After a variable delay period (0–1000 ms), a go cue appeared instructing the monkeys to reach toward the target. Recordings were made in the dorsal premotor cortex and in the primary motor cortex using a pair of implanted 96-electrode arrays. In Figure 6, we also reproduced data from Lara et al. (2018) and Zimnik and Churchland (2021). Details of animal care, surgery, electrophysiological recordings, and behavioral task for those data can be found in the Methods section of the respective papers.

### Arm model

To simulate reaching movements, we used the planar two-link arm model described in Li and Todorov (2004). The two links have lengths  $L_1$  and  $L_2$ , masses  $M_1$  and  $M_2$ , and moments of inertia  $I_1$  and  $I_2$  respectively. The lower arm’s center of mass is located a distance  $D_2$  from the elbow. By considering the geometry of the upper and lower limb, the position of the hand and elbow can be written as vectors  $\mathbf{y}_h(t)$  and  $\mathbf{y}_e$  given by

$$\begin{aligned} \mathbf{y}_h &= \begin{pmatrix} L_1 \cos \theta_1 + L_2 \cos(\theta_1 + \theta_2) \\ L_1 \sin \theta_1 + L_2 \sin(\theta_1 + \theta_2) \end{pmatrix} \text{ and} \\ \mathbf{y}_e &= \begin{pmatrix} L_1 \cos \theta_1 \\ L_1 \sin \theta_1 \end{pmatrix}. \end{aligned} \quad (6)$$

The joint angles  $\boldsymbol{\theta} = (\theta_1; \theta_2)^T$  evolve dynamically according to the differential equation

$$\mathbf{m}(t) = \mathcal{M}(\boldsymbol{\theta})\ddot{\boldsymbol{\theta}} + \mathcal{X}(\boldsymbol{\theta}, \dot{\boldsymbol{\theta}}) + \mathcal{B}\dot{\boldsymbol{\theta}}, \quad (7)$$

where  $\mathbf{m}(t)$  is the momentary torque vector,  $\mathcal{M}$  is the matrix of inertia,  $\mathcal{X}$  accounts for the centripetal and Coriolis forces, and  $\mathcal{B}$  is a damping matrix representing joint friction. These parameters are given by

$$\mathcal{M}(\boldsymbol{\theta}) = \begin{pmatrix} a_1 + 2a_2 \cos \theta_2 & a_3 + a_2 \cos \theta_2 \\ a_3 + a_2 \cos \theta_2 & a_3 \end{pmatrix} \quad (8)$$

$$\mathcal{X}(\boldsymbol{\theta}, \dot{\boldsymbol{\theta}}) = a_2 \sin \theta_2 \begin{pmatrix} -\dot{\theta}_2(2\dot{\theta}_1 + \dot{\theta}_2) \\ \dot{\theta}_1^2 \end{pmatrix} \quad (9)$$

$$\mathcal{B} = \begin{pmatrix} 0.05 & 0.025 \\ 0.025 & 0.05 \end{pmatrix} \quad (10)$$

with  $a_1 = I_1 + I_2 + M_2 L_1^2$ ,  $a_2 = M_2 L_1 D_2$ , and  $a_3 = I_2$ .

## iLQR algorithm

Throughout this work, we used the iLQR algorithm (Li and Todorov, 2004) to find the locally optimal inputs that minimize our cost function. iLQR is a trajectory optimization algorithm that can handle nonlinear dynamics and non-quadratic costs. iLQR works in an iterative manner, by linearizing the dynamics and performing a quadratic approximation of the cost at each iteration, thus turning the control problem into a local linear-quadratic problem whose unique solution is found using LQR (Kalman et al., 1960). The LQR solver uses a highly efficient dynamic programming approach that exploits the sequential structure of the problem. Our implementation of iLQR followed from Li and Todorov (2004), with the difference that we performed regularization of the local curvature matrix as recommended by Tassa (2011).

## Generation of the high-dimensional readouts and networks

**Generation of inhibitory-stabilized networks** Simulations in Figures 1, 3, 5 and 6 were conducted using inhibition-stabilized networks (ISN). Those were generated according to the procedure described in Hennequin et al. (2014) with minor adjustments. In brief, we initialized strongly connected chaotic networks with sparse and log-normally distributed excitatory weights, and stabilized them through progressive  $\mathcal{H}_2$ -optimal adjustments of the inhibitory weights until the spectral abscissa of the connectivity matrix fell below 0.8. This yielded strongly connected but stable networks with a strong degree of non-normality. When considering a larger range of ISNs (Figure 5), we independently varied both the variance of the distribution of initial excitatory weights and the spectral abscissa below which we stopped optimizing the inhibitory weights.

**Generation of additional networks in Figure 5** To assess the generality of our findings in Figure 5, we additionally generated randomly connected networks by sampling each weight from a Gaussian distribution with  $\sigma = R/\sqrt{N}$ , where the spectral radius  $R$  was varied between 0 and 0.99. We also sampled skew-symmetric networks by drawing a random network  $\mathbf{S}$  as above, and setting  $\mathbf{W} = (\mathbf{S} - \mathbf{S}^T)/2$ . We varied the radius  $R$  of the  $\mathbf{S}$  matrices between 0 and 5. Moreover, we considered diagonally shifted skew-symmetric networks  $\mathbf{W} = (\mathbf{S} - \mathbf{S}^T)/2 + \lambda \mathbf{I}$  where  $\lambda$  denotes the real part of all the eigenvalues and was varied between 0 and 0.8.

The elements of the readout matrix  $\mathbf{C}$  mapping neural activity onto torques were drawn from a normal distribution with zero mean and standard deviation  $\sigma_C = 0.05/\sqrt{N}$ . This was chosen to ensure that firing rates of standard deviation on the order of 30Hz would be decoded into torques of standard deviation  $\sim 2$  N/m, which is the natural variation required for the production of the reaches we considered.

## Details of Figure 4

To more easily dissect the phenomena leading to the presence or absence of preparation, we turned to 2D linear networks in Figure 4. We modelled nonnormal networks with a connectivity  $\mathbf{W} = \begin{bmatrix} 0 & 0 \\ w & 0 \end{bmatrix}$  and oscillatory networks with connectivity  $\mathbf{W} = \begin{bmatrix} 0 & -w \\ w & 0 \end{bmatrix}$ . The activity of the two units evolved as

$$\tau \dot{\mathbf{x}}(t) = -\mathbf{x}(t) + \mathbf{W}\mathbf{x}(t) + \mathbf{u}(t) \quad (11)$$

and directly influenced the acceleration of a one-dimensional output  $y(t)$  according to

$$\ddot{y}(t) = \mathbf{C}_i \mathbf{x}(t) \quad (12)$$

where  $\mathbf{C}_i = [\cos \theta_C \quad \sin \theta_C]$  was a row matrix reading the activity of the network along an angle  $\theta_C$  from the horizontal (first unit). Our setup aimed to mirror the reaching task studied in this work. We thus optimized inputs to minimize

the following cost function :

$$\begin{aligned}
 \mathcal{J}[\mathbf{u}] = & \underbrace{\int_0^T \|y(t) - y^*\|^2 \frac{t^2}{T^2} \frac{dt}{T}}_{\mathcal{J}_{\text{target}}} \\
 & + \underbrace{\alpha_{\text{null}} \int_{-\Delta_{\text{prep}}}^0 (\|y(t)\|^2 + \|\dot{y}(t)\|^2 + \|\ddot{y}\|^2) \frac{dt}{T}}_{\mathcal{J}_{\text{null}}} \\
 & + \underbrace{\alpha_{\text{effort}} \int_{-\Delta_{\text{prep}}}^T \|\mathbf{u}(t)\|^2 \frac{dt}{2T}}_{\mathcal{J}_{\text{effort}}}. \tag{13}
 \end{aligned}$$

where  $y^* = 20$  was the target position.

## Computing networks' controllability and observability to predict preparation in Figure 5

As part of our attempt to predict how much a network will prepare given its intrinsic properties only, we computed the prospective potency of the nullspace  $\alpha$ , and the controllability of the readout  $\beta$ . For a stable linear dynamical system described by

$$\frac{d\mathbf{x}}{dt} = \mathbf{A}\mathbf{x}(t) + \mathbf{B}\mathbf{u}(t) \tag{14}$$

$$\mathbf{y}(t) = \mathbf{C}\mathbf{x}(t), \tag{15}$$

the system's observability Gramian  $\mathbf{Q}$  can be computed as the unique positive-definite solution of the Lyapunov equation

$$\mathbf{A}^T \mathbf{Q} + \mathbf{Q} \mathbf{A} + \mathbf{C}^T \mathbf{C} = 0. \tag{16}$$

The prospective potency of the nullspace  $\mathbf{C}^\perp$  is then defined as

$$\alpha \triangleq \frac{\text{Tr}(\mathbf{C}^\perp \mathbf{Q} \mathbf{C}^{\perp T})}{N - 2} \tag{17}$$

Note that this measure  $\alpha$  is invariant to the specific choice of basis for the nullspace  $\mathbf{C}^\perp$ . Similarly, to assess the controllability of the readout, we first computed the controllability Gramian of the system  $\mathbf{P}$ , which is the solution of

$$\mathbf{A} \mathbf{P} + \mathbf{P} \mathbf{A}^T + \mathbf{B} \mathbf{B}^T = 0, \tag{18}$$

with  $\mathbf{B} = \mathbf{I}$  in our system. We then defined the controllability of the readout as

$$\beta \triangleq \frac{\text{Tr}(\mathbf{C} \mathbf{P} \mathbf{C}^T)}{2}. \tag{19}$$

## Details of Figure 6

**Cost function** We modelled sequences of reaches by modifying our cost functional to account for the presence of two targets, as

$$\begin{aligned}
 \mathcal{J}[\mathbf{u}] = & \underbrace{\int_0^{\Delta_{\text{move}}^{(1)} + \tau} \|\boldsymbol{\theta}(t) - \boldsymbol{\theta}_1^*\|^2 \frac{t^2}{T^2} dt}_{\mathcal{J}_{\text{target}}^{(1)}} \\
 & + \alpha_{\text{pause}} \underbrace{\int_{\Delta_{\text{move}}^{(1)}}^{\Delta_{\text{move}}^{(1)} + \tau} \|\dot{\boldsymbol{\theta}}(t)\|^2 dt}_{\mathcal{J}_{\text{pause}}} \\
 & + \underbrace{\int_{\Delta_{\text{move}}^{(1)} + \tau}^T \|\boldsymbol{\theta}(t) - \boldsymbol{\theta}_2^*\|^2 \frac{(t - \Delta_{\text{move}}^{(1)} - \tau)^2}{T^2} dt}_{\mathcal{J}_{\text{target}}^{(2)}} \\
 & + \alpha_{\text{null}} \underbrace{\int_{-\Delta_{\text{prep}}}^0 \|\boldsymbol{\theta}(t) - \boldsymbol{\theta}_0\|^2 + \|\dot{\boldsymbol{\theta}}(t)\|^2 + \|\mathbf{m}(t)\|^2 dt}_{\mathcal{J}_{\text{null}}} \\
 & + \alpha_{\text{effort}} \underbrace{\int_{-\Delta_{\text{prep}}}^T \|\mathbf{u}(t)\|^2 dt}_{\mathcal{J}_{\text{effort}}}
 \end{aligned} \tag{20}$$

$$\tag{21}$$

where  $\tau$  describes how long the monkey's hands had to stay on the intermediate target before performing its second reach. We used  $\tau = 600$  ms and  $\alpha_{\text{pause}} = 100$  for the double reaches in which a pause was explicitly enforced during the experiment. For compound reaches, the experiment did not require monkeys to stop for any specific duration. However, to ensure that the hand stopped on the target in the model (as it does in experiments when monkeys touch the screen) rather than fly through it, we set  $\tau = 6$  ms and  $\alpha_{\text{pause}} = 100$  when modelling compound reaches.

**Preparatory subspace analysis** Lara et al. (2018) proposed an analysis to identify preparatory and movement-related subspaces. This analysis allows to assess when the neural activity enters those subspaces, independently of whether it is delay-period or post-go-cue activity.

The method identifies a set of preparatory dimensions and a set of movement dimensions, constrained to be orthogonal to one another, as in Elsayed et al. (2016). These are found in the following manner: the trial-averaged neural activity is split between preparatory and movement-related epochs, yielding two matrices of size  $N \times MT$  where  $N$  is the number of neurons,  $T$  is the number of time bins and  $M$  is the number of reaches. One then optimizes the  $W_{\text{prep}} \in \mathbb{R}^{N \times d_{\text{prep}}}$  and  $W_{\text{mov}} \in \mathbb{R}^{N \times d_{\text{mov}}}$  (where  $d_{\text{prep}}$  and  $d_{\text{mov}}$  are the predefined dimensions of the two subspaces) such that the subspaces respectively capture most variance in the preparatory and movement activities, while being orthogonal to one another. This is achieved by maximizing the following objective :

$$\mathcal{C}(W_{\text{prep}}, W_{\text{mov}}) = \frac{1}{2} \left( \frac{\text{Tr}(W_{\text{prep}}^T C_{\text{prep}} W_{\text{prep}})}{Z_{\text{prep}}(d_{\text{prep}})} + \frac{\text{Tr}(W_{\text{mov}}^T C_{\text{mov}} W_{\text{mov}})}{Z_{\text{mov}}(d_{\text{mov}})} \right) \tag{22}$$

where  $C_{\text{prep/mov}}$  are the covariance matrices of the neural activity during the preparatory and movement epochs, respectively. The normalizing constant  $Z_{\text{prep}}(d_{\text{prep}})$  denotes the maximum amount of variance in preparatory activity that can be captured by any subspace of dimension  $d_{\text{prep}}$  (this is found via SVD), and similarly for  $Z_{\text{mov}}(d_{\text{mov}})$ . The objective is maximized under the constraints  $W_{\text{prep}}^T W_{\text{mov}} = 0$ ,  $W_{\text{prep}}^T W_{\text{prep}} = I$  and  $W_{\text{mov}}^T W_{\text{mov}} = I$ . We set subspace dimensions  $d_{\text{prep}} = d_{\text{mov}} = 6$ , although our results were robust to this choice.

The occupancy of the preparatory subspace was defined as

$$\text{occupancy}^{\text{prep}}(t) = \sum_{k=1}^{d_{\text{prep}}} \text{var}_{\theta}(x_k^{\text{prep}}(t, \theta))$$

and that of the movement subspace was defined as

$$\text{occupancy}^{\text{mov}}(t) = \sum_{k=1}^{d_{\text{mov}}} \text{var}_{\theta}(x_k^{\text{mov}}(t, \theta)).$$

For single reaches, we defined preparatory epoch responses as the activity in a 300ms window before the end of the delay period, and movement epoch responses as the activity in a 300ms window starting 50ms after the go cue. We normalized all neural activity traces using the same procedure as Churchland et al. (2012); Elsayed et al. (2016). For double reaches, we followed Zimmik and Churchland (2021) and used neural activity traces from both single reaches and the first reach of double-reach sequences. Note that we did not include any activity from the second reaches in the sequence, or from compound reaches, when defining the subspaces.

## Parameter table

| symbol                       | fig. 1 | fig. 2 | fig. 3 | fig. 5 | fig. 4 | fig. 6      | unit               | description                                |
|------------------------------|--------|--------|--------|--------|--------|-------------|--------------------|--------------------------------------------|
| $L_1$                        |        | 30     |        |        | -      | 30          | cm                 | length of the upper arm in model           |
| $L_2$                        |        | 30     |        |        | -      | 30          | cm                 | length of the forearm in model             |
| $I_1$                        |        | 0.025  |        |        | -      | 0.025       | kg.m <sup>-2</sup> | inertia of upper arm                       |
| $I_2$                        |        | 0.045  |        |        | -      | 0.045       | kg.m <sup>-2</sup> | inertia of forearm                         |
| $M_1$                        |        | 1.4    |        |        | -      | 1.4         | kg                 | mass of upper arm                          |
| $M_2$                        |        | 1.0    |        |        | -      | 1.0         | kg                 | mass of forearm                            |
| $D_2$                        |        | 16     |        |        | -      | 16          | cm                 | elbow to lower arm center of mass distance |
| $r$                          |        | 12     |        | 20     |        | 12          | cm                 | radius of the target reach                 |
| $\mu_h$                      |        | 20     |        | 0      |        | -           | mV                 | mean baseline firing rate                  |
| $\sigma_h$                   |        | 5      |        | 0      |        | -           | mV                 | s.t.d of the baseline firing rate          |
| $\alpha_{\text{effort}}$     |        | 5E-7   |        | 1E-5   |        | 5E-7        | -                  | coef. of input cost                        |
| $\alpha_{\text{null}}$       |        | 1      |        | 1      |        | 10          | -                  | coef. of cost of moving during the delay   |
| $\alpha_{\text{pause}}$      |        | -      |        | -      |        | 100         | -                  | coef. of cost of moving between reaches    |
| $\tau$                       |        | 150    |        |        |        |             | ms                 | single-neuron time constant                |
| $\Delta_{\text{move}}^{(1)}$ |        | -      |        |        |        | 300         | ms                 | duration of the first reach                |
| $\Delta_{\text{prep}}$       | 500    | 300    | -      | 300    |        | 500         | ms                 | delay period time                          |
| $T$                          | 1100   | 900    | -      | 900    |        | 2000 — 1406 | ms                 | total movement duration                    |
| $N$                          |        | 200    |        | -      |        | 200         | -                  | number of neurons                          |
| $p_{\text{con}}$             |        | 0.2    |        | -      |        | 0.2         | -                  | connection probability (E neurons)         |
| $p_E$                        |        | 80     |        | -      |        | 80          | -                  | percentage of E neurons                    |
| $p_I$                        |        | 20     |        | -      |        | 20          | -                  | percentage of I neurons                    |

Table 1: Parameters used for the various simulations.

## Acknowledgments

We are grateful to Matthew T. Kaufman and Mark M. Churchland for sharing data for the monkey experiments. We thank Kristopher Jensen, David Liu, Javier Antorán, and Rory Byrne for helpful comments on the manuscript. M.S. was funded by an EPSRC DTP studentship, and part of this work was performed using resources provided by the Cambridge Tier-2 system operated by the University of Cambridge Research Computing Service (<http://www.hpc.cam.ac.uk>) funded by EPSRC Tier-2 capital grant EP/P020259/1. For the purpose of open access, the authors have applied a Creative Commons Attribution (CC BY) licence to any Author Accepted Manuscript version arising from this submission.

## Competing interests

T-C.K. is currently a research scientist at Meta Reality Labs, but only contributed to this work while studying at the University of Cambridge.



## References

- Afshar, A., Santhanam, G., Byron, M. Y., Ryu, S. I., Sahani, M., and Shenoy, K. V. (2011). Single-trial neural correlates of arm movement preparation. *Neuron*, 71(3):555–564.
- Amos, B., Jimenez, I., Sacks, J., Boots, B., and Kolter, J. Z. (2018). Differentiable mpc for end-to-end planning and control. In *Advances in Neural Information Processing Systems*, pages 8289–8300.
- Brunel, N. (2000). Dynamics of sparsely connected networks of excitatory and inhibitory spiking neurons. *J. Comput. Neurosci.*, 8:183–208.
- Churchland, M. M., Cunningham, J. P., Kaufman, M. T., Foster, J. D., Nuyujukian, P., Ryu, S. I., and Shenoy, K. V. (2012). Neural population dynamics during reaching. *Nature*, 487(7405):51–56.
- Churchland, M. M., Cunningham, J. P., Kaufman, M. T., Ryu, S. I., and Shenoy, K. V. (2010). Cortical preparatory activity: representation of movement or first cog in a dynamical machine? *Neuron*, 68(3):387–400.
- Churchland, M. M. and Shenoy, K. V. (2007). Delay of movement caused by disruption of cortical preparatory activity. *Journal of neurophysiology*, 97(1):348–359.
- Dayan, P. and Abbott, L. F. (2001). *Theoretical neuroscience*. Cambridge, MA: MIT Press.
- Driscoll, L., Shenoy, K., and Sussillo, D. (2022). Flexible multitask computation in recurrent networks utilizes shared dynamical motifs. *bioRxiv*.
- Dubreuil, A., Valente, A., Beiran, M., Mastrogiuseppe, F., and Ostojic, S. (2021). The role of population structure in computations through neural dynamics. *bioRxiv*, pages 2020–07.
- Dum, R. P. and Strick, P. L. (1991). The origin of corticospinal projections from the premotor areas in the frontal lobe. *Journal of Neuroscience*, 11(3):667–689.
- Elsayed, G. F., Lara, A. H., Kaufman, M. T., Churchland, M. M., and Cunningham, J. P. (2016). Reorganization between preparatory and movement population responses in motor cortex. *Nature communications*, 7(1):1–15.
- Goldman, M. S. (2009). Memory without feedback in a neural network. *Neuron*, 61:621–634.
- Guo, Z. V., Li, N., Huber, D., Ophir, E., Gutnisky, D., Ting, J. T., Feng, G., and Svoboda, K. (2014). Flow of cortical activity underlying a tactile decision in mice. *Neuron*, 81:179–194.
- Harris, C. M. and Wolpert, D. M. (1998). Signal-dependent noise determines motor planning. *Nature*, 394(6695):780–784.
- Heald, J., Wolpert, D., and Lengyel, M. (2023). The computational and neural bases of context-dependent learning. *Ann. Rev. Neurosci.*, qq:1–27.
- Hennequin, G., Vogels, T. P., and Gerstner, W. (2012). Non-normal amplification in random balanced neuronal networks. *Physical Review E*, 86(1):011909.
- Hennequin, G., Vogels, T. P., and Gerstner, W. (2014). Optimal control of transient dynamics in balanced networks supports generation of complex movements. *Neuron*, 82(6):1394–1406.
- Kalidindi, H. T., Cross, K. P., Lillicrap, T. P., Omrani, M., Falotico, E., Sabes, P. N., and Scott, S. H. (2021). Rotational dynamics in motor cortex are consistent with a feedback controller. *Elife*, 10:e67256.
- Kalman, R. E. et al. (1960). Contributions to the theory of optimal control. *Bol. soc. mat. mexicana*, 5(2):102–119.
- Kao, T.-C. and Hennequin, G. (2019). Neuroscience out of control: control-theoretic perspectives on neural circuit dynamics. *Cur. Op. Neurobiol.*, 58:122–129.
- Kao, T.-C., Sadabadi, M. S., and Hennequin, G. (2021). Optimal anticipatory control as a theory of motor preparation: a thalamo-cortical circuit model. *Neuron*, 109.
- Kaufman, M. T., Churchland, M. M., Ryu, S. I., and Shenoy, K. V. (2014). Cortical activity in the null space: permitting preparation without movement. *Nature neuroscience*, 17(3):440–448.
- Lara, A. H., Elsayed, G. F., Zimnik, A. J., Cunningham, J. P., and Churchland, M. M. (2018). Conservation of preparatory neural events in monkey motor cortex regardless of how movement is initiated. *Elife*, 7:e31826.
- Li, N., Chen, T.-W., Guo, Z. V., Gerfen, C. R., and Svoboda, K. (2015). A motor cortex circuit for motor planning and movement. *Nature*, 519:51–56.
- Li, W. and Todorov, E. (2004). Iterative linear quadratic regulator design for nonlinear biological movement systems. In *ICINCO (1)*, pages 222–229.
- Logiaco, L., Abbott, L., and Escola, S. (2021). Thalamic control of cortical dynamics in a model of flexible motor sequencing. *Cell Reports*, 35(9):109090.
- Malonis, P. J., Hatsopoulos, N. G., MacLean, J. N., and Kaufman, M. T. (2021). M1 dynamics share similar inputs for initiating and correcting movement. *bioRxiv*.
- Meirhaeghe, N., Riehle, A., and Brochier, T. (2023). Parallel movement planning is achieved via an optimal preparatory state in motor cortex. *Cell Reports*, 42(2):112136.
- Michaels, J. A., Dann, B., Intveld, R. W., and Scherberger, H. (2015). Predicting reaction time from the neural state space of the premotor and parietal grasping network. *Journal of Neuroscience*, 35(32):11415–11432.
- Miri, A., Warriner, C. L., Seely, J. S., Elsayed, G. F., Cunningham, J. P., Churchland, M. M., and Jessell, T. M. (2017). Behaviorally selective engagement of short-latency effector pathways by motor cortex. *Neuron*, 95:683–696.
- Murphy, B. K. and Miller, K. D. (2009). Balanced amplification: a new mechanism of selective amplification of neural activity patterns. *Neuron*, 61:635–648.
- Pandarath, C., O’Shea, D. J., Collins, J., Jozefowicz, R., Stavisky, S. D., Kao, J. C., Trautmann, E. M., Kaufman, M. T., Ryu, S. I., Hochberg, L. R., et al. (2018). Inferring single-trial neural population dynamics using sequential auto-encoders. *Nature methods*, 15(10):805–815.

- Rawlings, J. B., Mayne, D. Q., and Diehl, M. (2017). *Model predictive control: theory, computation, and design*, volume 2. Nob Hill Publishing Madison, WI.
- Riehle, A. and Requin, J. (1989). Monkey primary motor and premotor cortex: single-cell activity related to prior information about direction and extent of an intended movement. *Journal of neurophysiology*, 61(3):534–549.
- Russo, A. A., Bittner, S. R., Perkins, S. M., Seely, J. S., London, B. M., Lara, A. H., Miri, A., Marshall, N. J., Kohn, A., Jessell, T. M., et al. (2018). Motor cortex embeds muscle-like commands in an untangled population response. *Neuron*, 97(4):953–966.
- Sauerbrei, B. A., Guo, J.-Z., Cohen, J. D., Mischiati, M., Guo, W., Kabra, M., Verma, N., Mensh, B., Branson, K., and Hantman, A. W. (2020). Cortical pattern generation during dexterous movement is input-driven. *Nature*, 577(7790):386–391.
- Schimel, M., Kao, T.-C., Jensen, K. T., and Hennequin, G. (2022). iLQR-VAE : control-based learning of input-driven dynamics with applications to neural data. In *International Conference on Learning Representations*.
- Sheahan, H. R., Franklin, D. W., and Wolpert, D. M. (2016). Motor planning, not execution, separates motor memories. *Neuron*, 92(4):773–779.
- Shenoy, K. V., Sahani, M., and Churchland, M. M. (2013). Cortical control of arm movements: a dynamical systems perspective. *Annual review of neuroscience*, 36.
- Skogestad, S. and Postlethwaite, I. (2007). *Multivariable feedback control: analysis and design*, volume 2. Wiley New York.
- Sohn, H., Meirhaeghe, N., Rajalingham, R., and Jazayeri, M. (2020). A network perspective on sensorimotor learning. *Trends in Neurosciences*.
- Soldado-Magraner, J., Mante, V., and Sahani, M. (2023). Inferring context-dependent computations through linear approximations of prefrontal cortex dynamics. *bioRxiv*.
- Sterling, P. and Laughlin, S. (2015). *Principles of neural design*. MIT press.
- Stroud, J. P., Porter, M. A., Hennequin, G., and Vogels, T. P. (2018). Motor primitives in space and time via targeted gain modulation in cortical networks. *Nature neuroscience*, 21(12):1774–1783.
- Sun, X., O’Shea, D. J., Golub, M. D., Trautmann, E. M., Vyas, S., Ryu, S. I., and Shenoy, K. V. (2022). Cortical preparatory activity indexes learned motor memories. *Nature*, pages 1–6.
- Sussillo, D., Churchland, M. M., Kaufman, M. T., and Shenoy, K. V. (2015). A neural network that finds a naturalistic solution for the production of muscle activity. *Nature neuroscience*, 18(7):1025–1033.
- Tassa, Y. (2011). *Theory and Implementation of Biomimetic Motor Controllers*. Hebrew University of Jerusalem.
- Todorov, E. and Jordan, M. I. (2002). Optimal feedback control as a theory of motor coordination. *Nature neuroscience*, 5(11):1226–1235.
- Todorov, E. and Li, W. (2003). Optimal control methods suitable for biomechanical systems. In *Proceedings of the 25th Annual International Conference of the IEEE Engineering in Medicine and Biology Society (IEEE Cat. No. 03CH37439)*, volume 2, pages 1758–1761. IEEE.
- Yeo, S.-H., Franklin, D. W., and Wolpert, D. M. (2016). When optimal feedback control is not enough: Feedforward strategies are required for optimal control with active sensing. *PLoS computational biology*, 12(12):e1005190.
- Zimnik, A. J. and Churchland, M. M. (2021). Independent generation of sequence elements by motor cortex. *Nature neuroscience*, 24(3):412–424.

# When and why does motor preparation arise in recurrent neural network models of motor control?

Marine Schimel<sup>@1</sup>, Ta-Chu Kao<sup>2</sup>, and Guillaume Hennequin<sup>1</sup>

<sup>1</sup>Computational and Biological Learning Lab, Department of Engineering, University of Cambridge, Cambridge, U.K.

<sup>2</sup>Meta Reality Labs

@ Corresponding author (mmcs3@cam.ac.uk)

## SUPPLEMENTARY MATERIAL

### Contents

|                                                                      |          |
|----------------------------------------------------------------------|----------|
| <b>S1 Choice of the hyperparameters of the model</b>                 | <b>1</b> |
| <b>S2 Investigation of the effect of the network decay timescale</b> | <b>2</b> |
| <b>S3 Additional results in the 2D system</b>                        | <b>3</b> |
| S3.1 Controllability and observability computations . . . . .        | 3        |
| S3.2 Predicting preparation in 2D networks . . . . .                 | 6        |
| <b>S4 Comparison across networks</b>                                 | <b>7</b> |

## 1 S1 Choice of the hyperparameters of the model

2 Our cost function for the delayed single-reaching task was composed of 3 components. The  
3 relative weighings of the different terms in our cost, which are hyperparameters of the model,  
4 affect the way in which the task is solved. To ensure robustness of our results to hyperparameter  
5 changes, we scanned the space of  $\alpha_{\text{null}}$  and  $\alpha_{\text{effort}}$  (as the solution is invariant to scaling of  
6 the cost, only those relative weighings matter), and evaluated the solutions found across this  
7 hyperparameter space for a delayed reach of 300 ms.

8 Our evaluation was based on multiple criteria. We considered the target to have been successfully  
9 reached if the mean distance to the target in the last 200 ms of the movement was lower  
10 than 5 mm (for a reach radius of 12 cm). We considered that the requirement to stay still  
11 during the delay period was satisfied if the mean torques during preparation were smaller than  
12 0.02 N/m. We computed the preparation index and total cost as described in [Equation \(5\)](#) and  
13 [Equation \(4\)](#). We moreover computed the total input energy per neuron as  $\frac{1}{N} \int_{-\Delta_{prep}}^T \|\mathbf{u}\|^2 dt$ ,  
14 and the maximum velocity as  $\max_t \sqrt{\dot{x}(t)^2 + \dot{y}(t)^2}$ . These various quantities are shown for a  
15 range of hyperparameters in [Figure S1](#), with the choice of hyperparameters used throughout our  
16 simulations marked with a red star. This shows that the behaviour of the model is consistent  
17 across a range of hyperparameter settings around the one we used.

18 In [Figure S2](#), we illustrate the output of the model for several hyperparameter settings. One  
19 can notice that for very small values of  $\alpha_{\text{effort}}$  the reach is successful, but executed with larger

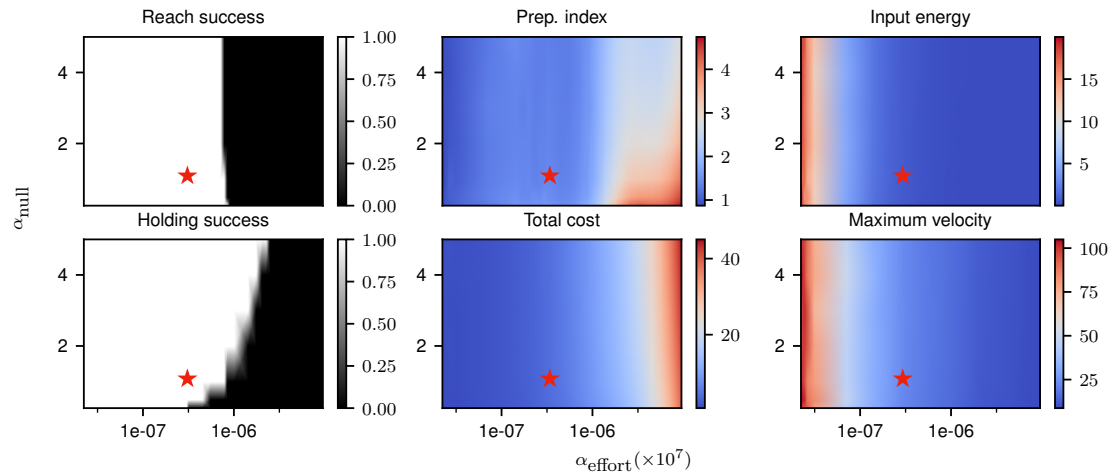

Figure S1: Correlates of the behaviour and control strategy across a wide range of hyperparameters. The “reach success” and “holding success” are set to 1 if the success criterion (see text) is satisfied and 0 otherwise. The task is executed successfully over a wide range of hyperparameters. The red star denotes the set of hyperparameters used in the main text simulations. This configuration was chosen to lie in a region in which the task can be successfully solved, with the performance being robust to small changes in the hyperparameters.

20 torques and velocity than is necessary – e.g the red and yellow reaches are equally successful  
 21 but the red one is much faster – which comes at the cost of larger inputs. We chose the set of  
 22 hyperparameters for our simulations such as to lie in an intermediate regime in which the task  
 23 is solved successfully, but without requiring more inputs than necessary.

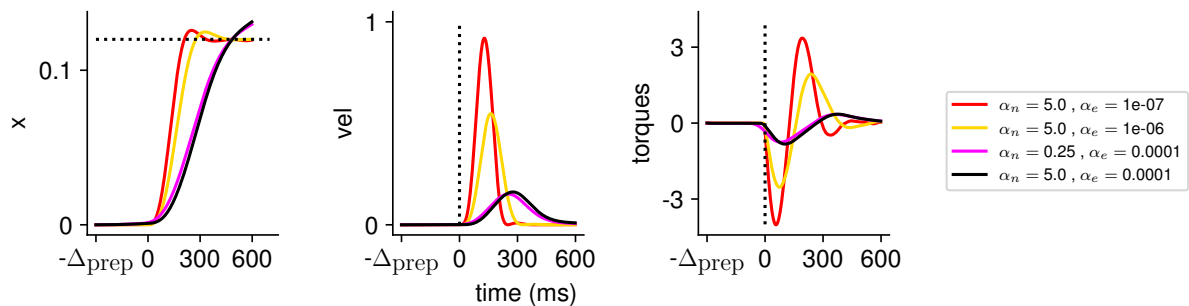

Figure S2: Illustration of the behaviour for several hyperparameter settings. (Left) Hand position along the horizontal axis, with the dotted line denoting the position of the target. (Middle) Temporal profile of the hand velocity. (Right) Temporal profile of the torques driving the hand.

## 24 S2 Investigation of the effect of the network decay timescale

25 **Figure 3** highlighted that preparatory inputs tend to consistently arise late during the delay  
 26 period. We hypothesized that this may be a reflection of the intrinsic tendency of the network  
 27 dynamics to decay, such that inputs given too early may be “lost”. To test this, we changed  
 28 the characteristic timescale of the dynamics *during preparation only*, leading to the following

29 dynamics:

$$\tau_t \frac{d\mathbf{x}(t)}{dt} = -\mathbf{x}(t) + \mathbf{W}\phi[\mathbf{x}(t)] + \mathbf{h} + \frac{\tau_t}{\tau_{\text{mov}}}\mathbf{u}(t) \text{ where } \begin{cases} \tau_t = \tau_{\text{prep}} & \text{if } t \leq 0 \\ \tau_t = \tau_{\text{mov}} & \text{if } t \geq 0 \end{cases} \quad (\text{S1})$$

30 with  $\tau_{\text{mov}} = 150\text{ms}$ . This allowed us to evaluate whether having dynamics decaying more slowly  
 31 during preparation led to inputs starting earlier. Note that we also rescaled the inputs during  
 32 preparation by  $\frac{\tau_{\text{prep}}}{\tau_{\text{mov}}}$ , to ensure that the effective cost of the inputs was not affected by the  
 33 timescale change.

34 As shown in [Figure S3](#), inputs started rising earlier when the network’s decay timescale was  
 35 longer. This was consistent with the hypothesis that the length of the window of preparation  
 36 that the optimal controller uses depends on the network’s intrinsic timescale.

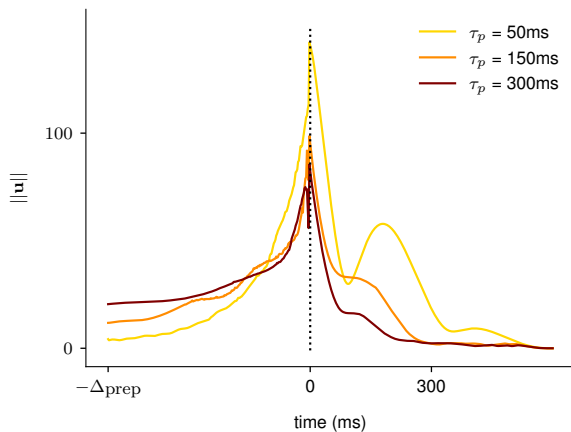

**Figure S3: Illustration of the effect of the characteristic neuronal timescale on the temporal distribution of the inputs.** We modified the characteristic neuronal timescale of the ISN during preparation only, and assessed how that changed the temporal distribution of inputs for 3 different timescales ( $\tau_{\text{prep}} = 50\text{ms}$ ,  $\tau_{\text{prep}} = 150\text{ms}$ ,  $\tau_{\text{prep}} = 300\text{ms}$ , top to bottom). As hypothesized, inputs started rising earlier during the preparation window when the decay timescale of the network was longer.

### 37 S3 Additional results in the 2D system

38 Our visualization of the behaviour of 2D networks in [Figure 4](#) allowed us to identify features  
 39 of the dynamics that were well-suited to predicting preparation. Below, we compute  $\alpha$  and  $\beta$   
 40 numerically and analytically in 2D oscillatory and nonnormal networks, to gain insights into  
 41 how these quantities vary with the networks’ dynamics. We then show how preparation can be  
 42 predicted highly accurately across a large number of 2D systems, using only those quantities to  
 43 summarize the network dynamics.

#### 44 S3.1 Controllability and observability computations

45 In [Figure S4](#), we computed  $\alpha$  and  $\beta$  numerically, as a function of the connectivity strength and  
 46 the choice of readout, for the nonnormal and the oscillatory motifs shown in [Figure 4](#). This  
 47 highlights the very different behaviours of the two networks, which are to some extent also  
 48 reflected in higher-dimensional models. In particular, we find a strong effect of the alignment  
 49 between the readout and the network dynamics in nonnormal networks, while  $\alpha$  and  $\beta$  are  
 50 independent of  $\theta_C$  in oscillatory networks. Interestingly, we see that  $\beta$  is constant across all  
 51 oscillatory networks, while  $\alpha$  increases with  $w$ .

52 As the reduced 2D model is more amenable to mathematical analysis than its high-dimensional  
 53 counterpart, we can gain further insights into the origin of these differences by computing  
 54  $\alpha(w, \theta_C)$  and  $\beta(w, \theta_C)$  analytically.

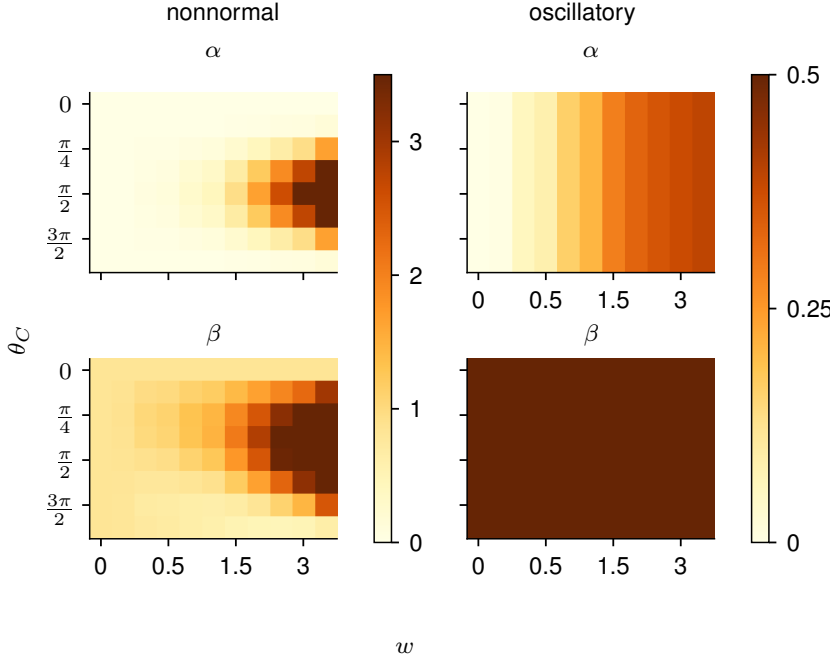

Figure S4: Illustration of  $\alpha$  and  $\beta$  as a function of  $\theta_C$  and  $w$  in the 2D networks.

55 Recall that the observability Gramian  $Q$  of a linear input-driven dynamical system satisfies

$$A^T Q + Q A + C^T C = 0 \quad (S2)$$

56 and the controllability Gramian satisfies

$$A P + P A^T + B B^T = 0, \quad (S3)$$

57 and that we defined  $\text{Tr}(C^\perp Q C^{\perp T})$  and  $\beta = \text{Tr}(C P C^T)$  where  $C^\perp$  denotes the nullspace of  
 58 the readout matrix. Below, we compute these quantities for the 2D oscillatory and nonnormal  
 59 networks, with  $B = I$  and  $C$  a unit-norm vector whose direction we parametrize via a quantity  
 60  $\theta_C$ . Note that we ignore the effect of  $dt$  and  $\tau$  in the mathematical analysis, as those quantities  
 61 can straightforwardly be included in the final result via a rescaling of  $w$  and  $B$ .

62 **Oscillatory network** In the case of  $A = -I + S$  where  $S$  is a skew-symmetric network  
 63 (i.e.  $S^T = -S$ ), Equation (S3) is solved by  $P = I/2$  independently of the value of  $S$ . This  
 64 explains why  $\beta = \text{Tr}(C P C^T) = \frac{1}{2} \|C\|^2$  is independent of both the connectivity strength  $w$  and  
 65 the orientation of the readout  $\theta_C$  for skew-symmetric networks (see Figure S4; bottom right).  
 66 Practically, this means that skew-symmetric networks are equally controllable in all directions:  
 67 when driven by random inputs, these networks display isotropic activity of equal variance along  
 68 all directions. Moreover, as  $w$  controls the oscillation frequency of the network, but does not  
 69 change the decay timescale of the eigenmodes, the amount of variance generated by a random  
 70 stimulation is independent of  $w$ . Interestingly, we can see in Figure S4 (top right) that  $\alpha$  displays  
 71 a different behaviour, and increases with  $w$ . As highlighted above, skew-symmetric systems are  
 72 rotationally symmetric. Without loss of generality, we can thus define our 1D vector to read out  
 73 the first unit, i.e.  $C = [1 \ 0]$ .

74 The observability Gramian must satisfy

$$A^T Q + Q A + C^T C = 0 \implies \begin{bmatrix} -1 & w \\ -w & -1 \end{bmatrix} Q + Q \begin{bmatrix} -1 & -w \\ w & -1 \end{bmatrix} = \begin{bmatrix} -1 & 0 \\ 0 & 0 \end{bmatrix}. \quad (S4)$$

75 This can be found in closed-form by solving the 2D system of equations, yielding

$$Q = \begin{bmatrix} \frac{1}{4} + \frac{1}{4(1+w^2)} & -\frac{w}{4(1+w^2)} \\ -\frac{w}{4(1+w^2)} & \frac{w^2}{4(1+w^2)} \end{bmatrix}. \quad (S5)$$

76 From there, we obtain  $\alpha = \text{Tr}(\mathbf{C}^\perp \mathbf{Q} \mathbf{C}^{\perp T}) = \frac{w^2}{4(1+w^2)}$ . As found empirically, this quantity will  
77 initially increase before plateauing towards 1/4 as  $w$  becomes large.

78 One might wonder why observability displays such a dependence on the oscillatory frequency of  
79 the network, even though the network is rotationally symmetric, and  $w$  does not affect the decay  
80 timescale. As highlighted in Equation (S2), controllability and observability Gramian would be  
81 identical for a skew-symmetric system if  $\mathbf{C} = \mathbf{I}$ . However, a feature of the systems we consider  
82 is the existence of a nullspace, i.e the fact that the readout  $\mathbf{C}$  only targets a subset of dimensions  
83 across the whole space (implying that  $\mathbf{C}^T \mathbf{C}$  is a low-rank matrix). Intuitively, the reason why  $\alpha$   
84 increases with  $w$  while  $\beta$  is constant in skew-symmetric networks can be understood as follows:  
85  $\alpha$  is computing how much *readout activity* a vector initialized in the nullspace of  $\mathbf{C}$  will generate,  
86 while  $\beta$  is computing the amount of energy that will be generated *across all directions* by a vector  
87 initialized in the readout space. Thus, assuming once again  $\mathbf{C} = [1 \ 0]$  and  $\mathbf{C}^\perp = [0 \ 1]$ , the  
88 activity of vectors initialized along  $\mathbf{C}$  and  $\mathbf{C}^\perp$  respectively and evolving autonomously from  
89 there is given by  $\mathbf{v}_C(t) = [e^{-t} \cos(wt) \ e^{-t} \sin(wt)]$  and  $\mathbf{v}_{C^\perp}(t) = [e^{-t} \sin(wt) \ -e^{-t} \cos(wt)]$ .

90 From there, we can compute  $\beta = \int_0^\infty \|\mathbf{v}_C(t)\|^2 dt = \int_0^\infty e^{-2t} dt = \frac{1}{2}$ . Thus, as found above, only  
91 the decay timescale of the envelope (fixed to 1 here) affects the value of  $\beta$ .

92 Importantly,  $\alpha$  will instead have a dependence on  $w$  arising from the fact that it depends on the  
93 size of the activity *projected into the readout*, as

$$\beta = \int_0^\infty \|\mathbf{v}_{C^\perp}(t)^T \mathbf{C}\|^2 dt = \int_0^\infty e^{-2t} \sin^2(wt) dt \quad (\text{S6})$$

$$= \frac{1}{2} \int_0^\infty e^{-2t} (1 - \cos(2wt)) dt \quad (\text{S7})$$

$$= \frac{1}{2} \int_0^\infty e^{-2t} - \Re e^{-2(1-iw)t} dt \quad (\text{S8})$$

$$= \frac{1}{4} - \frac{1}{4(1+w^2)} \quad (\text{S9})$$

$$= \frac{w^2}{4(1+w^2)}. \quad (\text{S10})$$

94 The dependence of this quantity on  $w$  can be understood by the fact that activity patterns  
95 initialized in the readout nullspace benefit from the existence of rotational dynamics, which  
96 allows them to be read-out before the activity decays completely.

97 **Nonnormal network** In the nonnormal network, we have  $\mathbf{A} = -\mathbf{I} + \mathbf{W} = \begin{bmatrix} -1 & 0 \\ w & -1 \end{bmatrix}$ .

98 The nonnormal 2D system, unlike its oscillatory counterpart, does not have rotational sym-  
99 metry. Thus, to remain general, we will consider  $\mathbf{C}(\theta_C) = [\cos \theta_C \ \sin \theta_C]$ , and  $\mathbf{C}^\perp(\theta_C) =$   
100  $[-\sin \theta_C \ \cos \theta_C]$ . Solving Equation (S2) for  $\mathbf{B} = \mathbf{I}$  leads to an expression for the controllabil-  
101 ity Gramian of the nonnormal system as

$$\mathbf{P}(w) = \begin{bmatrix} \frac{1}{2} & \frac{w}{4} \\ \frac{w}{4} & \frac{1}{2} + \frac{w^2}{4} \end{bmatrix}. \quad (\text{S11})$$

102 Similarly, computation of the observability Gramian leads to

$$\mathbf{Q}(w, \theta_C) = \begin{bmatrix} \frac{w^2 \sin^2 \theta_C}{4} + \frac{\cos \theta_C \sin \theta_C w}{2} + \frac{\cos^2 \theta_C}{2} & \frac{w \sin^2 \theta_C}{4} + \frac{\cos \theta_C \sin \theta_C}{2} \\ \frac{w \sin^2 \theta_C}{4} + \frac{\cos \theta_C \sin \theta_C}{2} & \frac{\sin^2 \theta_C}{2} \end{bmatrix}. \quad (\text{S12})$$

103 We can then compute

$$\alpha(\theta_C, w) = \mathbf{C}^{\perp T} \mathbf{Q} \mathbf{C}^\perp = \frac{w^2}{4} \sin^4 \theta_C \quad (\text{S13})$$

104 and

$$\beta(\theta_C, w) = \mathbf{C}^T \mathbf{P} \mathbf{C}^\perp = \frac{(w \sin \theta_C + \cos \theta_C)^2 - \cos^2 \theta_C + 2}{4}. \quad (\text{S14})$$

105 This highlights the dependence of  $\alpha$  and  $\beta$  on  $\theta_C$ , which can also be seen in [Figure S4](#) (left).  
106 Interestingly, these expressions also make evident the supralinear scaling of  $\alpha$  and  $\beta$  with  $w$   
107 in nonnormal networks. Note however that we never investigate preparation in the very large  
108  $w$  regime, as the simulation of such networks with discretized dynamics is prone to numerical  
109 issues.

### 110 S3.2 Predicting preparation in 2D networks

111 To assess how well preparation could be predicted from the control-theoretic properties  $\alpha$  and  
112  $\beta$  (c.f. main text) of 2D networks, we generated 20000 networks with weight matrix

$$\mathbf{W}(a, \omega, w_{\text{ff}}) = \begin{bmatrix} a & \frac{1}{2}(w_{\text{ff}} + \sqrt{w_{\text{ff}}^2 + 4\omega^2}) \\ \frac{1}{2}(w_{\text{ff}} - \sqrt{w_{\text{ff}}^2 + 4\omega^2}) & a \end{bmatrix} \quad (\text{S15})$$

113 where  $a \sim \mathcal{U}(0, 0.8)$ ,  $\omega \sim \mathcal{U}(0, 4)$ , and  $w_{\text{ff}} \sim \mathcal{U}(0, 4)$ . [Equation \(S15\)](#) implies that  $\mathbf{W}$  has  
114 a pair of complex-conjugate eigenvalues  $a \pm i\omega$ , and also embeds a feedforward coupling of  
115 strength  $w_{\text{ff}}$  from the second to the first dimension. For each network configuration, we computed  
116 the corresponding values of  $\alpha$  and  $\beta$ . To confirm our intuition that the preparation index  
117 should increase with  $\alpha$  and decrease with  $\beta$ , we first attempted to fit  $\text{prep. index} = c_0 + c_1 \frac{\alpha}{\beta}$ .  
118 Interestingly, we found that while this quantity was positively correlated with the preparation  
119 index across networks, a substantial fraction of variance remained unexplained (test  $R^2 = 0.16$ ).  
120 Labelling the preparation index by the rotational frequency of the network highlighted that  
121 a substantial fraction of the variance across networks came from this timescale of oscillations  
122 ([Figure S5](#), left). Indeed, a regression model of the for  $\text{prep. index} = c_0 + c_1 \omega \frac{\alpha}{\beta}$  captured 80%  
123 of the variance in preparation index, yielding an accurate fit across networks with only two free  
124 parameters ([Figure S5](#), right).

125 We stress that the predictive power of these simple fits is remarkable given that the preparation  
126 index comes out of a complex process of optimization over control inputs. Thus, the control-  
127 theoretic quantities  $\alpha$  and  $\beta$  appear to appropriately summarize the benefits of preparation for  
128 individual networks.

129 The fact that the preparation index also grows with  $\omega$  can be understood by considering the  
130 alignment between the activity trajectories which the network can autonomously generate and  
131 those that are required for solving the motor task. Indeed, a network that is intrinsically unable  
132 to generate outputs with the right oscillatory timescale would have to rely on movement-related  
133 inputs, i.e. would have a low preparation index. As observed here, the network's characteristic  
134 frequency has a big impact in 2D networks, consistent with  $\omega$  determining the *only* oscillatory  
135 pattern that the network can generate on its own. For high-dimensional networks, however,  
136 we did not have to incorporate such a measure of compatibility between task requirements and  
137 network dynamics (c.f. [Figure 5](#)). We speculate that this is due to averaging effects. Indeed,  
138 larger networks possess a wide range of intrinsic oscillatory timescales, and the readout matrix  
139 - which here was not aligned to the network's dynamics in any specific way - is expected to read  
140 out a little bit of all frequencies, including task-appropriate ones.



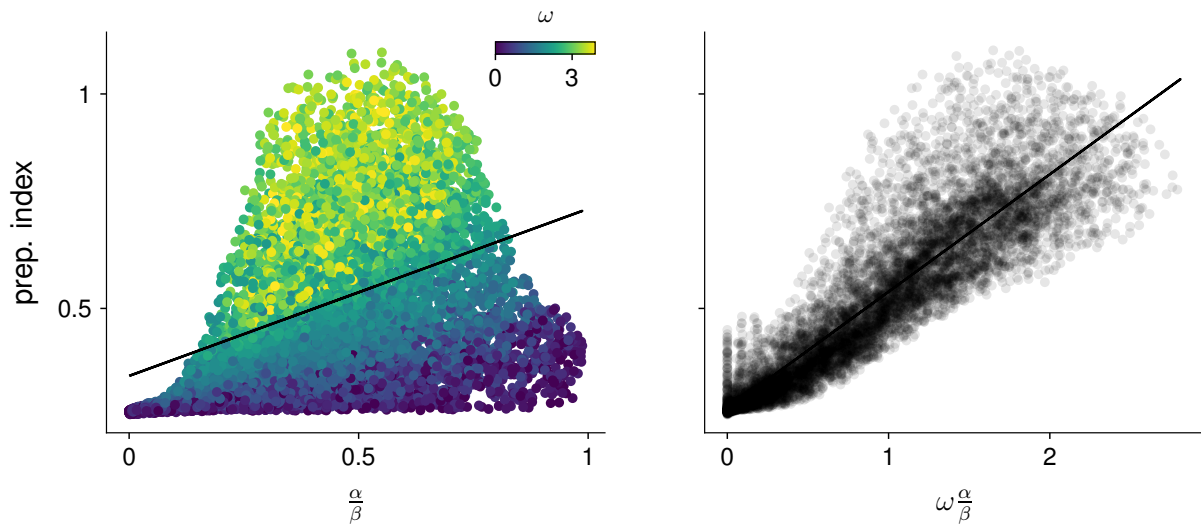

Figure S5: **Predicting the preparation index from characteristic network quantities.** We evaluated how well the preparation index could be predicted as a linear function of  $\frac{\alpha}{\beta}$  (left). A substantial amount of residual variance appeared to arise from variability in the oscillation frequency  $\omega$  (color). Accounting for this frequency by regressing the preparation index against  $\omega \frac{\alpha}{\beta}$  gave a better fit (right).

#### 141 S4 Comparison across networks

142 Our main investigation was largely focused on on behaviour of inhibition-stabilized networks,  
143 which are believed to constitute good models of M1. We however found that the expression we  
144 derived to obtain a network’s preparation index from its control-theoretic properties generalized  
145 across to other types of networks. Below, we detail the other network families we considered,  
146 and show how their dynamics qualitatively differ from the ISN, although their preparation can  
147 be predicted using the same quantities.

148 We modelled three additional classes of networks: randomly connected networks with either  
149 (i) unstructured or (ii) skew-symmetric connectivities, (iii) a surrogate network obtained by  
150 applying a similarity transformation to the ISN that preserved its eigenvalue spectrum but  
151 eliminated any “nonnormality” (i.e, we found  $\mathcal{T}$  such that  $\tilde{\mathbf{A}} = \mathcal{T}^{-1} \mathbf{A} \mathcal{T}$  where  $\tilde{\mathbf{A}}$  was a diagonal  
152 matrix with the same eigenvalues as  $\mathbf{A}$ ). Note that we did not apply the transformation to  
153 the readout or input matrices, such that the transfer function of the system was changed by  
154 our transformation. This was voluntary, as we were interested in the effect that transforming  
155 the dynamics would have on the input-output response. These networks were chosen for the  
156 diversity of dynamical motifs they exhibit: combinations of rapidly and slowly decaying modes,  
157 oscillations, and transient dynamics. Moreover, each of these network families could be sampled  
158 from in a straightforward manner, allowing to compute results across many instantiations of  
159 each network type. We again used random readout matrices not specifically adjusted to the  
160 dynamics of the network nor to the motor task. To get an intuition for how different networks  
161 solve the task, we generated one network from each family and qualitatively compared their  
162 inputs and internal activations when performing the same delayed reach (Figure S6A). We  
163 first considered an unconnected network, i.e. a network whose recurrent weights were all 0.  
164 Unsurprisingly, this network had no use for a preparation phase. Indeed, there is no benefit  
165 to giving early inputs as the network is unable to amplify them. More surprisingly, a random  
166 network with a much stronger connectivity – as can be seen in its eigenvalue spectrum forming  
167 a small ball of radius close to 1 (Figure S6A(top)) – also displayed very little preparation.  
168 The strong, visually apparent similarity between the inputs to the random and unconnected

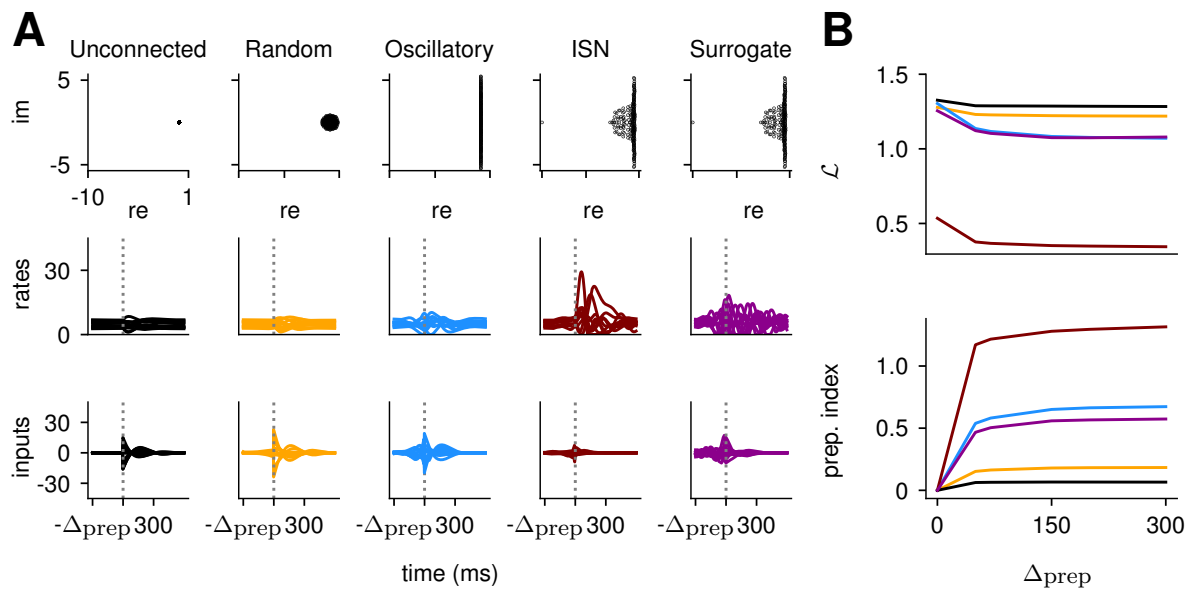

Figure S6: **Preparation arises across a range of network architectures** : neural correlates of the reach are shown for 5 different networks (A), alongside the loss and prep. index as a function of  $\Delta_{\text{prep}}$ . (A) Eigenvalue spectrum (top), internal network activations (middle) and inputs (bottom) for different network types. The unconnected network does not rely on preparatory inputs at all. The random network with weights draw from  $\mathcal{N}(0, 0.95/\sqrt{N})$  uses very little delay period inputs while the skew-symmetric network with  $\mathcal{N}(0, 4/\sqrt{N})$  shows a substantial amount of inputs during the delay period. The inhibition-stabilized network can be seen to rely most on preparation, more so than the similarity transformed ISN. (B) Loss (top) and preparation index (bottom) as a function of delay period length for the different networks. The unconnected and random networks can be seen to benefit very little from longer preparation times. Indeed, even as  $\Delta_{\text{prep}}$  increases, their amount of preparatory inputs remains very close to 0. On the other hand, the skew-symmetric network and the ISN use preparatory inputs (bottom), which allow them to have a lower loss for larger values of  $\Delta_{\text{prep}}$ . Interestingly, the surrogate ISN prepares considerably less than the full ISN.

169 networks suggests that the optimal way of controlling the random network relies largely on  
 170 ignoring its internal dynamics and solving the task almost entirely in an input-driven regime.  
 171 The example skew-symmetric network, which had imaginary eigenvalues only (ranging between  
 172 -5.5 and 5.5), displayed considerably more preparation, but still relied on strong inputs during  
 173 the movement phase that resembled those of the unconnected and random networks. Finally,  
 174 the ISN relied much more on preparation; the small inputs it receives are strongly amplified  
 175 into large activity patterns owing to its strong, nonnormal recurrent connectivity. Interestingly  
 176 however, the similarity transformed ISN lost much of that ability to amplify inputs, instead  
 177 displaying dynamics resembling that of the skew-symmetric network. This highlights the effect  
 178 of the ISN's nonnormal dynamics in shaping the network's activity and optimal inputs.

179 Next, we assessed more directly how beneficial preparation was for the different networks. We  
 180 evaluated how the total loss and preparation index evolved as a function of the delay period  
 181 length (Figure S6B). As expected, the control of networks that relied on preparation (skew-  
 182 symmetric and ISN) benefitted more from longer delays. The ISN has markedly lower control  
 183 cost and higher preparation index than other networks, reflecting the fact that even weak (thus  
 184 energetically cheap) inputs were sufficient to produce internal activity and thus output torques  
 185 of the desired magnitude (c.f. Figure S6A, right).

186 The above results give a sense of the range of possible dynamics that different types of networks  
 187 display. Interestingly, despite these differences, we showed in Figure 5 that the preparation index  
 188 could be predicted with a simple formula across all networks.
